# Supplementary material
Source: ML conference proceedings conference paper supplement (https://proceedings.neurips.cc/paper_files/paper/2023/hash/c3fe2a07ec47b89c50e89706d2e23358-Abstract.html)
Supplement: Supplementary file 1 [file c3fe2a07ec47b89c50e89706d2e23358-Supplemental-Conference.pdf]

---

# The Target-Charging Technique for Privacy Analysis across Interactive Computations

---

Anonymous Author(s)

Affiliation

Address

email

## Abstract

1        We propose the *Target Charging Technique* (TCT), a unified privacy analysis  
2        framework for interactive settings where a sensitive dataset is accessed multiple  
3        times using differentially private algorithms. Unlike traditional composition, where  
4        privacy guarantees deteriorate quickly with the number of accesses, TCT allows  
5        computations that don't hit a specified *target*, often the vast majority, to be es-  
6        sentially free (while incurring instead a small overhead on those that do hit their  
7        targets). TCT generalizes tools such as the sparse vector technique and top- $k$  se-  
8        lection from private candidates and extends their remarkable privacy enhancement  
9        benefits from noisy Lipschitz functions to general private algorithms.

## 10    1 Introduction

11    In many practical settings of data analysis and optimization, the dataset  $D$  is accessed multiple times  
12    interactively via different algorithms  $(\mathcal{A}_i)$ , so that  $\mathcal{A}_i$  depends on the transcript of prior responses  
13     $(\mathcal{A}_j(D))_{j < i}$ . When each  $\mathcal{A}_i$  is privacy-preserving, we are interested in tight end-to-end privacy  
14    analysis. We consider the standard statistical framework of differential privacy introduced in [11].  
15    *Composition* theorems [14] are a generic way to do that and achieve overall privacy cost that scales  
16    linearly or (via “advanced” composition) with square-root dependence in the number of private  
17    computations. We aim for a broad understanding of scenarios where the overall privacy bounds  
18    can be lowered significantly via the following paradigm: Each computation is specified by a private  
19    algorithm  $\mathcal{A}_i$  together with a *target*  $\top_i$ , that is a subset of its potential outputs. The total privacy cost  
20    depends only on computations where the output hits its target, that is  $\mathcal{A}_i(D) \in \top_i$ . This paradigm is  
21    suitable and can be highly beneficial when (i) the specified targets are a good proxy for the actual  
22    privacy exposure and (ii) we expect the majority of computations to not hit their target, and thus  
23    essentially be “free” in terms of privacy cost.

24    The Sparse Vector Technique (SVT) [12, 30, 18, 34] is a classic special case. SVT is designed  
25    for computations that have the form of approximate threshold tests applied to Lipschitz functions.  
26    Concretely, each such *AboveThreshold* test is specified by a 1-Lipschitz function  $f$  and a threshold  
27    value  $t$  and we wish to test whether  $f(D) \gtrsim t$ . The textbook SVT algorithm compares a noisy  
28    value with a noisy threshold (independent Laplace noise for the values and threshold noise that  
29    can be updated only after positive responses). Remarkably, the overall privacy cost depends only  
30    on positive responses: Roughly, composition is applied to twice the number of positive responses  
31    instead of to the total number of computations. In our terminology, the target of each test is a  
32    positive response. SVT privacy analysis benefits when the majority of *AboveThreshold* test results  
33    are negative (and hence “free”). This makes SVT a key ingredient in a range of methods [13]:  
34    private multiplicative weights [18], Propose-Test-Release [10], fine privacy analysis via distance-to-  
35    stability [33], model-agnostic private learning [1], and designing streaming algorithms that are robust  
36    to adaptive inputs [19, 6].

We aim to extend such target-hits privacy analysis to interactive applications of *general* private algorithms (that is, algorithms that provide privacy guarantees but have no other assumptions): private tests, where we would hope to incur privacy cost only for positive responses, and private algorithms that return more complex outputs, e.g., vector average, cluster centers, a sanitized dataset, or a trained ML model, where the goal is to incur privacy cost only when the output satisfies some criteria. Textbook SVT, however, is less amenable to such extensions: First, SVT departs from the natural paradigm of applying private algorithms to the dataset and reporting the output. A natural implementation of private AboveThreshold tests would add Laplace noise to the value and compare with the threshold. Instead, SVT takes as input the Lipschitz output of the non-private algorithms with threshold value and the privacy treatment is integrated (added noise both to values and threshold). The overall utility and privacy of the complete interaction are analyzed with respect to the non-private values, which is not suitable when the algorithms are already private. Moreover, the technique of using a hidden shared threshold noise across multiple AboveThreshold tests is specific for Lipschitz functions, introduces dependencies between responses, and more critically, results in separate privacy costs for reporting noisy values (that is often required by analytics tasks [22]).

Consider private tests. The natural paradigm is to sequentially choose a test, apply it, and report the result. The hope is to incur privacy loss only on positive responses. Private testing was considered in prior works [21, 7] but in ways that departed from this paradigm: [21] processed the private tests so that a positive answer is returned only when the probability  $p$  of a positive response by the private test is very close to 1. This seems unsatisfactory: If the design goal of the private testing algorithm was to report only very high probabilities, then this could have been more efficiently integrated into the design, and if otherwise, then we miss out on acceptable positive responses with moderately high probabilities (e.g. 95%).

Consider now *Top- $k$  selection*, which is a basic subroutine in data analysis, where input algorithms  $(\mathcal{A}_i)_{i \in [m]}$  (aka candidates) that return results with quality scores are provided in a *batch* (i.e., non interactively). The selection returns the  $k$  candidates with highest quality scores on our dataset. The respective private construct, where the data is sensitive and the algorithms are private, had been intensely studied [23, 17, 32]. The top- $k$  candidates can be viewed as target-hits and we might hope for privacy cost that is close to a composition over  $k$  private computations, instead of over  $m \gg k$ . The natural approach for top- $k$  is *one-shot* (Algorithm 3), where each algorithm is applied once and the responses with top- $k$  scores are reported. Prior works on private selection that achieve this analysis goal include those [9, 29] that use the natural one-shot selection but are tailored to Lipschitz functions (apply the Exponential Mechanism [24] or the Report-Noise-Max paradigm [13]) and works [21, 28, 7] that do apply with general private algorithms but significantly depart from the natural one-shot approach: They make a randomized number of computations that is generally much larger than  $m$ , with each  $\mathcal{A}_i$  invoked multiple times or none. The interpretation of the selection deviates from top-1 and does not naturally extend to top- $k$ . We seek privacy analysis that applies to one-shot top- $k$  selection with candidates that are general private algorithms.

The natural interactive paradigm and one-shot selection are simple, interpretable, and general. The departures made in prior works were made for a reason: Simple arguments (that apply with both top-1 one-shot private selection [21] and AboveThreshold tests) seem to preclude efficient target-charging privacy analysis: With pure-DP, if we perform  $m$  computations that are  $\epsilon$ -DP (that is,  $m$  candidates or  $m$  tests), then the privacy parameter value for a pure DP bound is  $\Omega(m)\epsilon$ . With approximate-DP, and even a single “hit,” the parameter values are  $(\Omega(\epsilon \log(1/\delta)), \delta)$ . The latter suggests a daunting overhead of  $O(\log(1/\delta))$  instead of  $O(1)$  per “hit.” We circumvent the mentioned limitations by taking approximate DP to be a reasonable relaxation and additionally, aim for application regimes where many private computations are performed on the same dataset and we expect multiple, say  $\Omega(\log(1/\delta))$ , “target hits” (e.g. positive tests and sum of the  $k$ -values of selections). With these relaxations in place, we seek a unified target-charging analysis (e.g. privacy charge that corresponds to  $O(1)$  calls per “target hit”) that applies with the natural paradigm across interactive calls and top- $k$  selections.

## 2 Overview of Contributions

We overview our contributions (proofs and details are provided in the Appendix). We introduce the *Target-Charging Technique (TCT)* for privacy analysis over interactive private computations (see Algorithm 1). Each computation performed on the sensitive dataset  $D$  is specified by a pair of private

algorithm  $\mathcal{A}_i$  and target  $\top_i$ . The interaction is halted after a pre-specified number  $\tau$  of computations satisfy  $\mathcal{A}_i(D) \in \top_i$ . We define targets as follows:

**Definition 2.1** ( $q$ -Target). *Let  $\mathcal{M} : X^n \rightarrow \mathcal{Y}$  be a randomized algorithm. For  $q \in (0, 1]$  and  $\varepsilon > 0$ , we say that a subset  $\top \subseteq \mathcal{Y}$  of outcomes is a  $q$ -Target of  $\mathcal{M}$ , if the following holds: For any pair  $D^0$  and  $D^1$  of neighboring data sets, there exist  $p \in [0, 1]$ , and three distributions  $\mathbf{C}$ ,  $\mathbf{B}^0$  and  $\mathbf{B}^1$  such that*

1. The distributions  $\mathcal{M}(D^0)$  and  $\mathcal{M}(D^1)$  can be written as the following mixtures:

$$\begin{aligned}\mathcal{M}(D^0) &\equiv p \cdot \mathbf{C} + (1 - p) \cdot \mathbf{B}^0, \\ \mathcal{M}(D^1) &\equiv p \cdot \mathbf{C} + (1 - p) \cdot \mathbf{B}^1.\end{aligned}$$

2.  $\mathbf{B}^0, \mathbf{B}^1$  are  $(\varepsilon, 0)$ -indistinguishable,

3.  $\min(\Pr[\mathbf{B}^0 \in \top], \Pr[\mathbf{B}^1 \in \top]) \geq q$ .

The effectiveness of a target as a proxy of the actual privacy cost is measured by its  $q$ -value where  $q \in (0, 1]$ . We interpret  $1/q$  as the *overhead factor* of the actual privacy exposure per target hit, that is, the number of private accesses that correspond to a single target hit. Note that an algorithm with a  $q$ -target for  $\varepsilon > 0$  must be  $(\varepsilon, 0)$ -DP and that any  $(\varepsilon, 0)$ -DP algorithm has a 1-target, as the set of all outcomes  $\top = \mathcal{Y}$  is a 1-target (and hence also a  $q$ -target for any  $q \leq 1$ ). More helpful targets are “smaller” (so that we are less likely to be charged) with a larger  $q$  (so that the overhead per charge is smaller). We establish the following privacy bounds.

**Lemma 2.2** (simplified meta privacy cost of target-charging). *The privacy parameters of Algorithm 1 (applied with  $\varepsilon$ -DP algorithms  $\mathcal{A}_i$  and  $q$ -targets  $\top_i$  until targets are hit  $\tau$  times) is  $(\varepsilon', \delta)$  where  $\varepsilon' \approx \frac{\tau}{q}\varepsilon$  and  $\delta = e^{-\Omega(\tau)}$ .*

Alternatively, we obtain parameter values  $(\varepsilon', \delta') = (f_\varepsilon(r, \varepsilon), f_\delta(r, \varepsilon) + e^{-\Omega(\tau)})$  where  $r \approx \tau/q$  and  $(f_\varepsilon(r, \varepsilon), f_\delta(r, \varepsilon))$  are privacy parameter values for advanced composition [14] of  $r$   $\varepsilon$ -DP computations.

Proof details for a more general statement that also applies with approximate DP algorithms are provided in Section B (in which case the  $\delta$  parameters of all calls simply add up). The idea is simple: We compare the execution of Algorithm 4 on two neighboring data sets  $D^0, D^1$ . Given a request  $(\mathcal{A}, \top)$ , let  $p, \mathbf{C}, \mathbf{B}^0, \mathbf{B}^1$  be the decomposition of  $\mathcal{A}$  w.r.t.  $D^0, D^1$  given by Definition 2.1. Then, running  $\mathcal{A}$  on  $D^0, D^1$  can be implemented in the following equivalent way: we flip a  $p$ -biased coin. With probability  $p$ , the algorithm samples from  $\mathbf{C}$  and returns the result, without accessing  $D^0, D^1$  at all (!). Otherwise, the algorithm needs to sample from  $\mathbf{B}^0$  or  $\mathbf{B}^1$ , depending on whether the private data is  $D^0$  or  $D^1$ . However, by Property 3 in Definition 2.1, there is a probability of at least  $q$  that Algorithm 1 will “notice” the privacy-leaking computation by observing a result in the target set  $\top$ . If this indeed happens, the algorithm increments the counter. On average, each counter increment corresponds to  $\frac{1}{q}$  accesses to the private data. Therefore we use the number of target hits (multiplied by  $1/q$ ) as a proxy for the actual privacy leak. Finally, we apply concentration inequalities to obtain high confidence bounds on the probability that the actual number of accesses significantly exceeds its expectation of  $\tau/q$ . The multiplicative error decreases when the number  $\tau$  of target hits is larger. In the regime  $\tau > \ln(1/\delta)$ , we amortize the mentioned  $O(\log(1/\delta))$  overhead of the natural paradigm so that each target hit results in privacy cost equivalent to  $O(1/q)$  calls. In the regime of very few target hits (e.g., few private tests or private selections), we still have to effectively “pay” for the larger  $\tau = \Omega(\ln(1/\delta))$ , but TCT still has some advantages over alternative approaches, due to its use of the natural paradigm and its applicability with general private algorithms.

TCT is simple but turns out to be surprisingly powerful due to natural targets with low overhead. We present an expansive toolkit that is built on top of TCT and describe application scenarios.

## 2.1 NotPrior targets

A NotPrior target of an  $\varepsilon$ -DP algorithm is specified by any outcome of our choice (the “prior”) that we denote by  $\perp$ . The NotPrior target is the set of all outcomes except  $\perp$ . Surprisingly perhaps, this is an effective target (See Section C for the proof that applies also with approximate-DP):

---

**Algorithm 1:** Target Charging

---

**Input:** Dataset  $D = \{x_1, \dots, x_n\} \in X^n$ . Integer  $\tau \geq 1$  (Upper limit on the number of target hits).  
Fraction  $q \in [0, 1]$ .  
 $C \leftarrow 0$  // Initialize target hit counter  
**while**  $C < \tau$  **do** // Main loop  
    **Receive**  $(\mathcal{A}, \mathbb{T})$  where  $\mathcal{A}$  is an  $\varepsilon$ -DP mechanism, and  $\mathbb{T}$  is a  $q$ -target for  $\mathcal{A}$   
     $r \leftarrow \mathcal{A}(D)$   
    **Publish**  $r$   
    **if**  $r \in \mathbb{T}$  **then**  $C \leftarrow C + 1$  // outcome is a target hit

---

139 **Lemma 2.3** (Property of a NotPrior target). *Let  $\mathcal{A} : X \rightarrow \mathcal{Y} \cup \{\perp\}$ , where  $\perp \notin \mathcal{Y}$ , be an  $\varepsilon$ -DP*  
140 *algorithm. Then the set of outcomes  $\mathcal{Y}$  constitutes an  $\frac{1}{e\varepsilon+1}$ -target for  $\mathcal{A}$ .*

141 Note that for small  $\varepsilon$ , we have  $q$  approaching  $1/2$  and thus the overhead factor is close to 2. The  
142 TCT privacy analysis is beneficial over plain composition when the majority of all outcomes in our  
143 interaction match their prior  $\perp$ . We describe application scenarios for NotPrior targets. For most of  
144 these scenarios, TCT is the only method we are aware of that provides the stated privacy guarantees  
145 in the general context.

146 **Private testing** A private test is a private algorithm with a Boolean output. By specifying our prior  
147 to be a negative response, we obtain (for small  $\varepsilon$ ) an overhead of 2 for positive responses, which  
148 matches SVT. TCT is the only method we are aware of that provides SVT-like guarantees with  
149 general private tests.

150 **Pay-only-for-change** When we have a prior on the result of each computation and expect the  
151 results of most computations to agree with their respective prior, we set  $\perp$  to be our prior. We report  
152 all results but pay only for those that disagree with the prior. We describe some use cases where  
153 paying only for change can be very beneficial (i) the priors are results of the same computations on an  
154 older dataset, so they are likely to remain the same (ii) In streaming or dynamic graph algorithms, the  
155 input is a sequence of updates where typically the number of changes to the output is much smaller  
156 than the number of updates. Differential privacy was used to obtain algorithms that are robust to  
157 adaptive inputs [19, 2] by private aggregation of non-robust copies. The pay-only-for-change allows  
158 for number of changes to output (instead of the much larger number of updates) that is quadratic in  
159 the number of copies. Our result enables such gain with any private aggregation algorithm (that is not  
160 necessarily in the form of AboveThreshold tests).

## 161 2.2 Conditional Release

162 We have a private algorithm  $\mathcal{A} : X \rightarrow \mathcal{Y}$  but are interested in the output  $\mathcal{A}(D)$  only when a certain  
163 condition holds (i.e., when the output is in  $\mathbb{T} \subseteq \mathcal{Y}$ ). The condition may depend on the interaction  
164 transcript thus far (depend on prior computations and outputs). We expect most computations not  
165 to meet their release conditions and want to be “charged” only for the ones that do. Recall that  
166 with differential privacy, not reporting a result also leaks information on the dataset, so this is not  
167 straightforward. We define  $\mathcal{A}_{\mathbb{T}} := \text{ConditionalRelease}(\mathcal{A}, \mathbb{T})$  as the operation that inputs a  
168 dataset  $D$ , computes  $y \leftarrow \mathcal{A}(D)$ . If  $y \in \mathbb{T}$ , then publish  $y$  and otherwise publish  $\perp$ . We show that  
169 this operation can be analysed in TCT as a call with the algorithm and NotPrior target pair  $(\mathcal{A}_{\mathbb{T}}, \mathbb{T})$ ,  
170 that is, a target hit occurs if and only if  $y \in \mathbb{T}$ :

171 **Lemma 2.4** (ConditionalRelease privacy analysis).  *$\mathcal{A}_{\mathbb{T}}$  satisfies the privacy parameters of  $\mathcal{A}$*   
172 *and  $\mathbb{T}$  is a NotPrior target of  $\mathcal{A}_{\mathbb{T}}$ .*

173 *Proof.*  $\mathcal{A}_{\mathbb{T}}$  processes the output of the private algorithm  $\mathcal{A}$  and thus from post processing property  
174 is also private with the same privacy parameter values. Now note that  $\mathbb{T}$  is a NotPrior target of  $\mathcal{A}$ ,  
175 with respect to prior  $\perp$ .  $\square$

176 We describe some example use-cases:

177 (i) Private learning of models from the data (clustering, regression, average, ML model) but we are  
 178 interested in the result only when its quality is sufficient, say above a specified threshold, or when  
 179 some other conditions hold.

180 (ii) Greedy coverage or representative selection type applications, where we incur privacy cost only  
 181 for selected items. To do so, we condition the release on the “coverage” of past responses. For  
 182 example, when greedily selecting a subset of features that are most relevant or a subset of centers that  
 183 bring most value.

184 (iii) Approximate AboveThreshold tests on Lipschitz functions, with release of above-threshold  
 185 noisy values: As mentioned, SVT incurs additional privacy cost for the reporting whereas TCT (using  
 186 ConditionalRelease) does not, so TCT benefits in the regime of sufficiently many target hits.

187 (iv) AboveThreshold tests with sketch-based approximate distinct counts: Distinct counting  
 188 sketches [16, 15, 5] meet the privacy requirement by the built-in sketch randomness [31]. We  
 189 apply ConditionalRelease and set  $\top$  to be above threshold values. In comparison, despite the  
 190 function (distinct count) being 1-Lipschitz, the use of SVT for this task incurs higher overheads in  
 191 utility (approximation quality) and privacy: Even for the goal of just testing, a direct use of SVT  
 192 treats the approximate value as the non-private input, which reduces accuracy due to the additional  
 193 added noise. Treating the reported value as a noisy Lipschitz still incurs accuracy loss due to the  
 194 threshold noise, threshold noise introduces bias, and analysis is complicated by the response not  
 195 following a particular noise distribution. For releasing values, SVT as a separate distinct-count sketch  
 196 is needed to obtain an independent noisy value [22], which increases both storage and privacy costs.

### 197 2.3 Conditional Release with Revisions

198 We present an extension of Conditional Release that allows for followup *revisions* of the target. The  
 199 initial ConditionalRelease and the followup ReviseCR calls are described in Algorithm 2. The  
 200 ConditionalRelease call specifies a computation identifier  $h$  for later reference, an algorithm and  
 201 a target pair  $(\mathcal{A}, \top)$ . It draws  $r_h \sim \mathcal{A}(D)$  and internally stores  $r_h$  and a current target  $\top_h \leftarrow \top$ .  
 202 When  $r_h \in \top$  then  $r_h$  is published and a charge is made. Otherwise,  $\perp$  is published. Each (followup)  
 203 ReviseCR call specifies an identifier  $h$  and a disjoint extension  $\top'$  to its current target  $\top_h$ . If  $r_h \in \top'$ ,  
 204 then  $r_h$  is published and a charge is made. Otherwise,  $\perp$  is published. The stored current target for  
 205 computation  $h$  is augmented to include  $\top'$ . Note that a target hit occurs at most once in a sequence of  
 206 (initial and followup revise) calls and if and only if the result of the initial computation  $r_h$  is in the  
 207 final target  $\top_h$ .

---

#### Algorithm 2: Conditional Release and Revise Calls

---

```

// Initial Conditional Release call: Analysed in TCT as a  $(\epsilon, \delta)$ -DP algorithm  $\mathcal{A}_\top$  and NotPrior target  $\top$ 
Function ConditionalRelease( $h, \mathcal{A}, \top$ ): // unique identifier  $h$ , an  $(\epsilon, \delta)$ -DP algorithm  $\mathcal{A} \rightarrow \mathcal{Y}$ ,
 $\top \subset \mathcal{Y}$ 
   $\top_h \leftarrow \top$  // Current target for computation  $h$ 
  TCT Charge for  $\delta$  // If  $\delta > 0$ , see Section B
   $r_h \leftarrow \mathcal{A}(D)$  // Result for computation  $h$ 
  if  $r_h \in \top_h$  then // publish and charge only if outcome is in  $\top_h$ 
    Publish  $r_h$ 
    TCT Charge for a NotPrior target hit of an  $\epsilon$ -DP algorithm
  else
    Publish  $\perp$ 

// Revise call: Analysed in TCT as a  $2\epsilon$ -DP Algorithm  $(\mathcal{A} \mid \neg \top_h)_{\top'}$  and NotPrior target  $\top'$ 
Function ReviseCR( $h, \top'$ ): // Revise target to include  $\top'$ 
  Input: An identifier  $h$  of a prior ConditionalRelease call, target extension  $\top'$  where  $\top' \cap \top_h = \emptyset$ 
  if  $r_h \in \top'$  then // Result is in current target, publish and charge
    Publish  $r_h$ 
    TCT Charge for a NotPrior target hit of an  $2\epsilon$ -DP algorithm
  else
    Publish  $\perp$ 
   $\top_h \leftarrow \top_h \cup \top'$  // Update the target to include extension

```

---

208 We show the following (Proof provided in Section D):

209 **Lemma 2.5** (Privacy analysis for Algorithm 2). *Each `ReviseCR` call can be analysed in TCT as a*  
 210 *call to a  $2\varepsilon$ -DP algorithm with a `NotPrior` target  $\top'$ .*

211 Thus, the privacy cost of conditional release followed by a sequence of revise calls is within a factor  
 212 of 2 (due to the doubled privacy parameter on revise calls) of a single `ConditionalRelease` call  
 213 made with the final target. The revisions extension of conditional release facilitates our results for  
 214 private selection, which are highlighted next.

## 215 2.4 Private Top- $k$ Selection

216 Consider the nature one-shot top- $k$  selection procedure as shown in Algorithm 3: We call each  
 217 algorithm once and report the  $k$  responses with the highest quality scores. We establish the following:

218 **Lemma 2.6** (Privacy of One-Shot Top- $k$  Selection). *Consider one-shot top- $k$  selection (Algorithm 3)*  
 219 *on a dataset  $D$  where  $\{\mathcal{A}_i\}$  are  $(\varepsilon, \delta_i)$ -DP. This selection can be simulated exactly in TCT by a*  
 220 *sequence of calls to  $(2\varepsilon, \delta)$ -DP algorithms with `NotPrior` targets that has  $k$  target hits.*

221 *As a corollary, assuming  $\varepsilon < 1$ , Algorithm 3 is  $(O(\varepsilon\sqrt{k\log(1/\delta)}), 2^{-\Omega(k)} + \delta + \sum_i \delta_i)$ -DP for*  
 222 *every  $\delta > 0$ .*

223 To the best of our knowledge, our result is the first such bound for one-shot selection from general  
 224 private candidates. For the case when the only computation performed on  $D$  is a single top-1 selection,  
 225 we match the “bad example” in [21] (see Theorem I.1). In the regime where  $k > \log(1/\delta)$  our bounds  
 226 generalize those specific to Lipschitz functions in [9, 29] (see Section I). Moreover, Lemma 2.6  
 227 allows for a unified privacy analysis of interactive computations that are interleaved with one-shot  
 228 selections. We obtain  $O(1)$  overhead per target hit when there are  $\Omega(\log(1/\delta))$  hits in total.

---

### Algorithm 3: One-Shot Top- $k$ Selection

---

**Input:** A dataset  $D$ . Candidate algorithms  $\mathcal{A}_1, \dots, \mathcal{A}_m$ . Parameter  $k \leq m$ .

$S \leftarrow \emptyset$

**for**  $i = 1, \dots, m$  **do**  
      $(y_i, s_i) \leftarrow \mathcal{A}_i(D)$   
      $S \leftarrow S \cup \{(i, y_i, s_i)\}$

**return**  $L \leftarrow$  the top- $k$  triplets from  $S$ , by decreasing  $s_i$

---

229 The proofs of Lemma 2.6 and implications to selection tasks are provided in Section I. The proof  
 230 utilizes Conditional Release with revisions (Section 2.3).

### 231 2.4.1 Selection using Conditional Release

232 We analyze private selection procedures using conditional release (see Section I for details). First note  
 233 that `ConditionalRelease` calls (without revising) suffice for *one-shot above-threshold* selection  
 234 (release all results with a quality score that exceeds a pre-specified threshold  $t$ ), with target hits only  
 235 on what was released: We simply specify the release condition to be  $s_i > t$ . What is missing in order  
 236 to implement one-shot top- $k$  selection is an ability to find the “right” threshold (a value  $t$  so that  
 237 exactly  $k$  candidates have quality scores above  $t$ ), while incurring only  $k$  target hits. The revise calls  
 238 provide the functionality of lowering the threshold of previous conditional release calls (lowering  
 239 the threshold amounts to augmenting the target). This functionality allows us to simulate a sweep  
 240 of the  $m$  results of the batch in the order of decreasing quality scores. We can stop the sweep when  
 241 a certain condition is met (the condition must be based on the prefix of the ordered sequence that  
 242 we viewed so far) and we incur target hits only for the prefix. To simulate a sweep, we run a high  
 243 threshold conditional release of all  $m$  candidates and then incrementally lower the threshold using  
 244 sets of  $m$  revise calls (one call per candidate). The released results are in decreasing order of quality  
 245 scores. To prove Lemma 2.6 we observe that the one-shot top- $k$  selection (Algorithm 3) is simulated  
 246 exactly by such a sweep that halts after  $k$  scores are released (the sweep is only used for analysis).

247 As mentioned, with this approach we can apply *any stopping condition that depends on the prefix*.  
 248 This allows us to use data-dependent selection criteria. One natural such criteria (instead of using a  
 249 rigid value of  $k$ ) is to choose  $k$  when there is a large gap in the quality scores, that the  $(k+1)$ st quality

score is much lower than the  $k$ th score [35]. This criterion can be implemented using a one-shot algorithm and analyzed in the same way using an equivalent sweep. Data-dependent criteria are also commonly used in applications such as clustering (choose “the right” number of clusters according to gap in clustering cost) and greedy selection of representatives.

## 2.5 Best of multiple targets

*Multi-target* charging is a simple but useful extension of Algorithm 1 (that is “single target”). With  $k$ -TCT, queries have the form  $(\mathcal{A}, (\top_i)_{i \in [k]})$  where  $\top_i$  for  $i \in [k]$  are  $q$ -targets (we allow targets to overlap). The algorithm maintains  $k$  counters  $(C_i)_{i \in [k]}$ . For each query, for each  $i$ , we increment  $C_i$  if  $r \in \top_i$ . We halt when  $\min_i C_i = \tau$ .

The multi-target extension allows us to flexibly reduce the total privacy cost to that of the “best” among  $k$  target indices *in retrospect* (the one that is hit the least number of times). Interestingly, this extension is almost free in terms of privacy cost: The number of targets  $k$  only multiplies the  $\delta$  privacy parameter (see Section B.1 for details).

## 2.6 BetweenThresholds in TCT

The `BetweenThresholds` classifier is a refinement of the `AboveThreshold` test. `BetweenThresholds` reports if the noisy Lipschitz value is below, between, or above two thresholds  $t_l < t_r$ . `BetweenThresholds` was analysed in [3] in the SVT framework (using noisy thresholds) and it was shown that the overall privacy costs may only depend on the “between” outcomes. Their analysis required that  $t_r - t_l \geq (12/\varepsilon)(\log(10/\varepsilon) + \log(1/\delta) + 1)$ . We consider the “natural” private `BetweenThresholds` classifier that compares the value with added  $\text{Lap}(1/\varepsilon)$  noise to the thresholds. We show (see Section G) that the “between” outcome is a target with  $q \geq (1 - e^{-(t_r - t_l)\varepsilon}) \cdot \frac{1}{e^\varepsilon + 1}$ . Note that the  $q$ -value is smaller by a factor of  $(1 - e^{-(t_r - t_l)\varepsilon})$  compared with `NotPrior` targets. Therefore, there is smooth degradation in the effectiveness of the between outcome as the target as the gap  $t_r - t_l$  decreases, and matching `AboveThreshold` when the gap is large. Also note that we require much smaller gaps  $t_r - t_l$  compared with [3], also asymptotically ( $O(\log(1/\varepsilon))$  factor improvement). This brings `BetweenThresholds` into the practical regime.

We can compare an `AboveThreshold` test with a threshold  $t$  with a `BetweenThresholds` classifier with  $t_l = t - 1/\varepsilon$  and  $t_r = t + 1/\varepsilon$ . Surprisingly perhaps, despite `BetweenThresholds` being *more informative* than `AboveThreshold`, as it provides more granular information on the value, its privacy cost is *lower* for queries where values are either well above or well below the thresholds (since target hits are unlikely also when queries are well above the threshold). Somehow, the addition of a third outcome to the test tightened the privacy analysis! A natural question is whether we can extend this benefit more generally – inject a “boundary outcome” when our private algorithm does not have one, and tighten the privacy analysis. We introduce next a method that achieves this goal.

## 2.7 The Boundary Wrapper Method

When the algorithm is a tester or a classifier, the result is most meaningful when one outcome dominates the distribution  $\mathcal{A}(D)$ . Moreover, when performing a sequence of tests or classification tasks we might expect most queries to have high confidence labels (e.g., [27, 1]). Our hope then is to incur privacy cost that depends only on the “uncertainty,” captured by the probability of non-dominant outcomes. When we have for each computation a good prior on which outcome is most likely, this goal can be achieved via `NotPrior` targets (Section 2.1). When we expect the whole sequence to be dominated by one type of outcome, even when we don’t know which one it is, this goal can be achieved via `NotPrior` with multiple targets (Section 2.5). But these approaches do not apply when a dominant outcome exists in most computations but we have no handle on it.

For a private test  $\mathcal{A}$ , can we choose a moving target *per computation* to be the value with the smaller probability  $\arg \min_{b \in \{0,1\}} \Pr[\mathcal{A}(D) = b]$ ? More generally, with a private classifier, can we somehow choose the target to be all outcomes except for the most likely one? Our *boundary wrapper*, described in Algorithm 4, achieves that goal. The privacy wrapper  $\mathcal{W}$  takes any private algorithm  $\mathcal{A}$ , such as a tester or a classifier, and wraps it to obtain algorithm  $\mathcal{W}(\mathcal{A})$ . The wrapped algorithm has its outcome set augmented to include one *boundary* outcome  $\top$  that is designed to be a  $q$ -target. The wrapper returns  $\top$  with some probability that depends on the distribution of  $\mathcal{A}(D)$  and otherwise

301 returns a sample from  $\mathcal{A}(D)$  (that is, the output we would get when directly applying  $\mathcal{A}$  to  $D$ ). We  
 302 then analyse the wrapped algorithm in TCT.

303 Note that the probability of the wrapper  $\mathcal{A}$  returning  $\top$  is at most  $1/3$  and is roughly proportional  
 304 to the probability of sampling an outcome other than the most likely from  $\mathcal{A}(D)$ . When there is no  
 305 dominant outcome the  $\top$  probability tops at  $1/3$ . Also note that a dominant outcome (has probability  
 306  $p \in [1/2, 1]$  in  $\mathcal{A}(D)$ ) has probability  $p/(2-p)$  to be reported. This is at least  $1/3$  when  $p = 1/2$   
 307 and is close to 1 when  $p$  is close to 1. For the special case of  $\mathcal{A}$  being a private test, there is always a  
 308 dominant outcome.

309 A wrapped AboveThreshold test provides the benefit of BetweenThresholds discussed in Sec-  
 310 tion 2.6 where we do not pay privacy cost for values that are far from the threshold (on either side).  
 311 This is achieved mechanically without the need to explicitly introduce two thresholds around the  
 312 given one and defining a different algorithm.

---

**Algorithm 4:** Boundary Wrapper

---

**Input:** Dataset  $D = \{x_1, \dots, x_n\} \in X^n$ , a private algorithm  $\mathcal{A}$   
 $r^* \leftarrow \arg \max_r \Pr[\mathcal{A}(D) = r]$  // The most likely outcome of  $\mathcal{A}(D)$   
 $\pi(D) \leftarrow 1 - \Pr[\mathcal{A}(D) = r^*]$  // Probability that  $\mathcal{A}$  does not return the most likely outcome  
 $c \sim \text{Ber}(\min\{\frac{1}{3}, \frac{\pi}{1+\pi}\})$  // Coin toss for boundary  
**if**  $c = 1$  **then Return**  $\top$  **else Return**  $\mathcal{A}(D)$  // return boundary or value

---

313 We show (proofs provided in Section E) that the wrapped algorithm is nearly as private as its baseline:

314 **Lemma 2.7** (Privacy of a wrapped algorithm). *If  $\mathcal{A}$  is  $\varepsilon$ -DP then Algorithm 4 applied to  $\mathcal{A}$  is  $t(\varepsilon)$ -DP*  
 315 *where  $t(\varepsilon) \leq \frac{4}{3}\varepsilon$ .*

316 **Lemma 2.8** ( $q$ -value of the boundary target). *The outcome  $\top$  of a boundary wrapper (Algorithm 4)*  
 317 *of an  $\varepsilon$ -DP algorithm is a  $\frac{e^{t(\varepsilon)} - 1}{2(e^{\varepsilon + t(\varepsilon)} - 1)}$ -target.*

318 For small  $\varepsilon$  we obtain  $q \approx t(\varepsilon)/(2(\varepsilon + t(\varepsilon)))$ . Substituting  $t(\varepsilon) = \frac{4}{3}\varepsilon$  we obtain  $q \approx \frac{2}{7}$ . Since the  
 319 target  $\top$  has probability at most  $1/3$ , this is a small loss of efficiency (1/6 factor overhead) compared  
 320 with composition in the worst case when there are no dominant outcomes.

321 The boundary wrapper yields light-weight privacy analysis that pays only for the “uncertainty” of the  
 322 response distribution  $\mathcal{A}(D)$  and can be an alternative to more complex approaches based on smooth  
 323 sensitivity (the stability of  $\mathcal{A}(D)$  to changes in  $D$ ) [25, 10, 33]. Note that the boundary-wrapper  
 324 method assumes availability of the probability of the most dominant outcome in the distribution  $\mathcal{A}(D)$ ,  
 325 when it is large enough. The probability can always be computed without incurring privacy costs (only  
 326 computation cost) and is readily available with the Exponential Mechanism [24] or when applying  
 327 known noise distributions for AboveThreshold, BetweenThresholds, and Report-Noise-Max [9].  
 328 In Section F we propose a boundary-wrapper that only uses sampling access to  $\mathcal{A}(D)$ .

### 329 2.7.1 Applications to Private Learning using Non-privacy-preserving Models

330 Methods that achieve private learning through training non-private models include Private Aggregation  
 331 of Teacher Ensembles (PATE) [26, 27] and Model-Agnostic private learning [1]. The private dataset  
 332  $D$  is partitioned into  $k$  parts  $D = D_1 \sqcup \dots \sqcup D_k$  and a model is trained (non-privately) on each  
 333 part. For multi-class classification with  $c$  labels, the trained models can be viewed as functions  
 334  $\{f_i : \mathcal{X} \rightarrow [c]\}_{i \in [k]}$ . Note that changing one sample in  $D$  can only change the training set of one  
 335 of the models. To privately label an example  $x$  drawn from a public distribution, we compute the  
 336 predictions of all the models  $\{f_i(x)\}_{i \in [k]}$  and consider the counts  $n_j = \sum_{i \in [k]} \mathbf{1}\{f_i(x) = j\}$  (the  
 337 number of models that gave label  $j$  to example  $x$ ) for  $j \in [c]$ . We then privately aggregate to obtain a  
 338 private label, for example using the Exponential Mechanism [24] or Report-Noisy-Max [9, 29]. This  
 339 setup is used to process queries (label examples) until the privacy budget is exceeded. In PATE, the  
 340 new privately-labeled examples are used to train a new *student* model (and  $\{f_i\}$  are called *teacher*  
 341 models). In these applications we seek tight privacy analysis. Composition over all queries – for  
 342  $O(1)$  privacy, only allows for  $O(k^2)$  queries. We aim to replace this with  $O(k^2)$  “target hits.” These  
 343 works used a combination of methods including SVT, smooth sensitivity, distance-to-instability, and  
 344 propose-test-release [10, 33]. The TCT toolkit can streamline the analysis:

(i) It was noted in [1, 27] that when the teacher models are sufficiently accurate, we can expect that  $n_j \gg k/2$  on the ground truth label  $j$  on most queries. High-agreement examples are also more useful for training the student model. Moreover, agreement implies stability and lower privacy cost (when accounted through the mentioned methods) is lower. Instead, to gain from this stability, we can apply the boundary wrapper (Algorithm 4) on top of the Exponential Mechanism. Then use  $\top$  as our target. Agreement queries, where  $\max_j n_j \gg k/2$  (or more finely, when  $h = \arg \max_j n_j$  and  $n_h \gg \max_{j \in [k] \setminus \{h\}} n_j$ ) are very unlikely to be target hits.

(ii) If we expect most queries to be either high agreement  $\max_j n_j \gg k/2$  or no agreement  $\max_j n_j \ll k/2$  and would like to avoid privacy charges also with no agreement, we can apply AboveThreshold test to  $\max_j n_j$ . If above, we apply the exponential mechanism. Otherwise, we report “Low.” The wrapper applied to the combined algorithm returns a label in  $[c]$ , “Low,” or  $\top$ . Note that “Low” is a dominant outcome with no-agreement queries (where the actual label is not useful anyway) and a class label in  $[c]$  is a dominant outcome with high agreement. We therefore incur privacy loss only on weak agreements.

## 2.8 SVT with individual privacy charging

Our TCT privacy analysis simplifies and improves the analysis of SVT with individual privacy charging, introduced by Kaplan et al [20]. The input is a dataset  $D \in \mathcal{X}^n$  and an online sequence of linear queries that are specified by predicate and threshold value pairs  $(f_i, T_i)$ . For each query, the algorithm reports noisy AboveThreshold test results  $\sum_{x \in D} f_i(x) \gtrsim T$ . Compared with the standard SVT, which halts after reporting  $\tau$  positive responses, SVT with individual charging maintains a separate budget counter  $C_x$  for each item  $x$ . For each query with a positive response, the algorithm only charges items that *contribute* to this query (namely, all the  $x$ ’s such that  $f_i(x) = 1$ ). Once an item  $x$  contributes to  $\tau$  hits (that is,  $C_x = \tau$ ), it is removed from the data set. This finer privacy charging facilitates better utility with the same privacy budget, as demonstrated by several recent works [20, 6]. Compared with prior work [20]: Our algorithm uses the “natural” approach of adding Laplace noise and comparing, i.e., computing  $\hat{f}_i = (\sum_{x \in D} f_i(x)) + \text{Lap}(1/\varepsilon)$  and testing whether  $\hat{f}_i \geq T$ , whereas [20] adds two independent Laplace noises. We can publish the approximate sum  $\hat{f}_i$  for “Above-Threshold” without additional privacy loss. Moreover, our analysis is much simpler (few lines instead of several pages) and for the same privacy budget improves the additive error by a  $\log(1/\varepsilon)\sqrt{\log(1/\delta)}$  factor. Importantly, our improvement aligns the bounds of SVT with individual privacy charging with those of standard SVT, bringing the former into the practical regime. See Section H for details.

---

### Algorithm 5: SVT with Individual Privacy Charging

---

**Input:** Private data set  $D \in \mathcal{X}^n$ ; privacy budget  $\tau > 0$ ; Privacy parameter  $\varepsilon > 0$ .

```

foreach  $x \in D$  do  $C_x \leftarrow 0$                                 // Initialize a counter for item  $x$ 
for  $i = 1, 2, \dots$ , do                                         // Receive queries
    Receive a predicate  $f_i : \mathcal{X} \rightarrow [0, 1]$  and threshold  $T_i \in \mathbb{R}$ 
     $\hat{f}_i \leftarrow (\sum_{x \in D} f_i(x)) + \text{Lap}(1/\varepsilon)$            // Add Laplace noise to count
    if  $\hat{f}_i \geq T_i$  then                                         // Compare with threshold
        Publish  $\hat{f}_i$ 
        foreach  $x \in D$  such that  $f(x) > 0$  do
             $C_x \leftarrow C_x + 1$ 
            if  $C_x = \tau$  then Remove  $x$  from  $D$ 
    else Publish  $\perp$ 

```

---

376

**Conclusion** We introduced the Target Charging Technique (TCT), a versatile unified privacy analysis framework that is particularly suitable when a sensitive dataset is accessed multiple times via differentially private algorithms. We provide an expansive toolkit and demonstrate significant improvement over prior work for basic tasks such as private testing and one-shot selection, describe use cases, and list challenges for followup works. TCT is simple with low overhead and we hope will be adopted in practice.

## References

- [1] Raef Bassily, Om Thakkar, and Abhradeep Guha Thakurta. Model-agnostic private learning. In S. Bengio, H. Wallach, H. Larochelle, K. Grauman, N. Cesa-Bianchi, and R. Garnett, editors, *Advances in Neural Information Processing Systems*, volume 31. Curran Associates, Inc., 2018.
- [2] Amos Beimel, Haim Kaplan, Yishay Mansour, Kobbi Nissim, Thatchaphol Saranurak, and Uri Stemmer. Dynamic algorithms against an adaptive adversary: Generic constructions and lower bounds. *CoRR*, abs/2111.03980, 2021.
- [3] Mark Bun, Thomas Steinke, and Jonathan Ullman. *Make Up Your Mind: The Price of Online Queries in Differential Privacy*, pages 1306–1325. 2017.
- [4] H. Chernoff. A measure of the asymptotic efficiency for test of a hypothesis based on the sum of observations. *Annals of Math. Statistics*, 23:493–509, 1952.
- [5] E. Cohen. Hyperloglog hyper extended: Sketches for concave sublinear frequency statistics. In *KDD*. ACM, 2017. full version: <https://arxiv.org/abs/1607.06517>.
- [6] Edith Cohen, Xin Lyu, Jelani Nelson, Tamás Sarlós, Moshe Shechner, and Uri Stemmer. On the robustness of countsketch to adaptive inputs. In *Proceedings of the 39th International Conference on Machine Learning (ICML)*, 2022.
- [7] Edith Cohen, Xin Lyu, Jelani Nelson, Tamás Sarlós, and Uri Stemmer. Generalized Private Selection and Testing with High Confidence. In *14th Innovations in Theoretical Computer Science Conference (ITCS 2023)*, volume 251 of *Leibniz International Proceedings in Informatics (LIPIcs)*, Dagstuhl, Germany, 2023. Schloss Dagstuhl – Leibniz-Zentrum für Informatik.
- [8] Edith Cohen, Xin Lyu, Jelani Nelson, Tamás Sarlós, and Uri Stemmer.  $\tilde{O}$ ptimal differentially private learning of thresholds and quasi-concave optimization, 2022.
- [9] David Durfee and Ryan M. Rogers. Practical differentially private top-k selection with pay-what-you-get composition. In Hanna M. Wallach, Hugo Larochelle, Alina Beygelzimer, Florence d’Alché-Buc, Emily B. Fox, and Roman Garnett, editors, *Advances in Neural Information Processing Systems 32: Annual Conference on Neural Information Processing Systems 2019, NeurIPS 2019, December 8-14, 2019, Vancouver, BC, Canada*, pages 3527–3537, 2019.
- [10] Cynthia Dwork and Jing Lei. Differential privacy and robust statistics. STOC ’09, New York, NY, USA, 2009. Association for Computing Machinery.
- [11] Cynthia Dwork, Frank McSherry, Kobbi Nissim, and Adam Smith. Calibrating noise to sensitivity in private data analysis. In *TCC*, 2006.
- [12] Cynthia Dwork, Moni Naor, Omer Reingold, Guy N. Rothblum, and Salil Vadhan. On the complexity of differentially private data release: Efficient algorithms and hardness results. In *Proceedings of the Forty-First Annual ACM Symposium on Theory of Computing*, STOC ’09, page 381–390, New York, NY, USA, 2009. Association for Computing Machinery.
- [13] Cynthia Dwork and Aaron Roth. The algorithmic foundations of differential privacy. *Found. Trends Theor. Comput. Sci.*, 9(3–4):211–407, aug 2014.
- [14] Cynthia Dwork, Guy N. Rothblum, and Salil P. Vadhan. Boosting and differential privacy. In *51th Annual IEEE Symposium on Foundations of Computer Science, FOCS 2010, October 23-26, 2010, Las Vegas, Nevada, USA*, pages 51–60. IEEE Computer Society, 2010.
- [15] P. Flajolet, E. Fusy, O. Gandouet, and F. Meunier. Hyperloglog: The analysis of a near-optimal cardinality estimation algorithm. In *Analysis of Algorithms (AofA)*. DMTCS, 2007.
- [16] P. Flajolet and G. N. Martin. Probabilistic counting algorithms for data base applications. *Journal of Computer and System Sciences*, 31:182–209, 1985.
- [17] Arik Friedman and Assaf Schuster. Data mining with differential privacy. In *Proceedings of the 16th ACM SIGKDD International Conference on Knowledge Discovery and Data Mining*, KDD ’10, page 493–502, New York, NY, USA, 2010. Association for Computing Machinery.

- 430 [18] Moritz Hardt and Guy N. Rothblum. A multiplicative weights mechanism for privacy-preserving  
431 data analysis. In *51th Annual IEEE Symposium on Foundations of Computer Science, FOCS*  
432 *2010, October 23-26, 2010, Las Vegas, Nevada, USA*, pages 61–70. IEEE Computer Society,  
433 2010.
- 434 [19] Avinatan Hassidim, Haim Kaplan, Yishay Mansour, Yossi Matias, and Uri Stemmer. Adversari-  
435 ally robust streaming algorithms via differential privacy. In *Annual Conference on Advances in*  
436 *Neural Information Processing Systems (NeurIPS)*, 2020.
- 437 [20] Haim Kaplan, Yishay Mansour, and Uri Stemmer. The sparse vector technique, revisited. In  
438 Mikhail Belkin and Samory Kpotufe, editors, *Conference on Learning Theory, COLT 2021,*  
439 *15-19 August 2021, Boulder, Colorado, USA*, volume 134 of *Proceedings of Machine Learning*  
440 *Research*, pages 2747–2776. PMLR, 2021.
- 441 [21] Jingcheng Liu and Kunal Talwar. Private selection from private candidates. In Moses Charikar  
442 and Edith Cohen, editors, *Proceedings of the 51st Annual ACM SIGACT Symposium on Theory*  
443 *of Computing, STOC 2019, Phoenix, AZ, USA, June 23-26, 2019*, pages 298–309. ACM, 2019.
- 444 [22] Min Lyu, Dong Su, and Ninghui Li. Understanding the sparse vector technique for differential  
445 privacy. *Proc. VLDB Endow.*, 10(6):637–648, 2017.
- 446 [23] Frank McSherry and Ilya Mironov. Differentially private recommender systems: Building  
447 privacy into the netflix prize contenders. In *Proceedings of the 15th ACM SIGKDD International*  
448 *Conference on Knowledge Discovery and Data Mining, KDD ’09*, page 627–636, New York,  
449 NY, USA, 2009. Association for Computing Machinery.
- 450 [24] Frank McSherry and Kunal Talwar. Mechanism design via differential privacy. In *48th Annual*  
451 *IEEE Symposium on Foundations of Computer Science (FOCS 2007), October 20-23, 2007,*  
452 *Providence, RI, USA, Proceedings*, pages 94–103. IEEE Computer Society, 2007.
- 453 [25] Kobbi Nissim, Sofya Raskhodnikova, and Adam Smith. Smooth sensitivity and sampling in  
454 private data analysis. In *Proceedings of the Thirty-Ninth Annual ACM Symposium on Theory of*  
455 *Computing, STOC ’07*, page 75–84, New York, NY, USA, 2007. Association for Computing  
456 Machinery.
- 457 [26] Nicolas Papernot, Martín Abadi, Úlfar Erlingsson, Ian J. Goodfellow, and Kunal Talwar. Semi-  
458 supervised knowledge transfer for deep learning from private training data. In *5th International*  
459 *Conference on Learning Representations, ICLR 2017, Toulon, France, April 24-26, 2017,*  
460 *Conference Track Proceedings*. OpenReview.net, 2017.
- 461 [27] Nicolas Papernot, Shuang Song, Ilya Mironov, Ananth Raghunathan, Kunal Talwar, and Úlfar  
462 Erlingsson. Scalable private learning with PATE. In *6th International Conference on Learning*  
463 *Representations, ICLR 2018, Vancouver, BC, Canada, April 30 - May 3, 2018, Conference Track*  
464 *Proceedings*. OpenReview.net, 2018.
- 465 [28] Nicolas Papernot and Thomas Steinke. Hyperparameter tuning with Rényi differential privacy.  
466 In *The Tenth International Conference on Learning Representations, ICLR 2022, Virtual Event,*  
467 *April 25-29, 2022*. OpenReview.net, 2022.
- 468 [29] Gang Qiao, Weijie J. Su, and Li Zhang. Oneshot differentially private top-k selection. In Marina  
469 Meila and Tong Zhang, editors, *Proceedings of the 38th International Conference on Machine*  
470 *Learning, ICML 2021, 18-24 July 2021, Virtual Event*, volume 139 of *Proceedings of Machine*  
471 *Learning Research*, pages 8672–8681. PMLR, 2021.
- 472 [30] Aaron Roth and Tim Roughgarden. Interactive privacy via the median mechanism. In Leonard J.  
473 Schulman, editor, *Proceedings of the 42nd ACM Symposium on Theory of Computing, STOC*  
474 *2010, Cambridge, Massachusetts, USA, 5-8 June 2010*, pages 765–774. ACM, 2010.
- 475 [31] Adam Smith, Shuang Song, and Abhradeep Thakurta. The flajolet-martin sketch itself pre-  
476 serves differential privacy: Private counting with minimal space. In *Proceedings of the 34th*  
477 *International Conference on Neural Information Processing Systems, NIPS’20*, 2020.

- 478 [32] Thomas Steinke and Jonathan R. Ullman. Tight lower bounds for differentially private selection.  
479 In Chris Umans, editor, *58th IEEE Annual Symposium on Foundations of Computer Science,*  
480 *FOCS 2017, Berkeley, CA, USA, October 15-17, 2017*, pages 552–563. IEEE Computer Society,  
481 2017.
- 482 [33] Abhradeep Guha Thakurta and Adam Smith. Differentially private feature selection via stability  
483 arguments, and the robustness of the lasso. In Shai Shalev-Shwartz and Ingo Steinwart, editors,  
484 *Proceedings of the 26th Annual Conference on Learning Theory*, volume 30 of *Proceedings of*  
485 *Machine Learning Research*, pages 819–850, Princeton, NJ, USA, 12–14 Jun 2013. PMLR.
- 486 [34] Salil P. Vadhan. The complexity of differential privacy. In Yehuda Lindell, editor, *Tutorials on*  
487 *the Foundations of Cryptography*, pages 347–450. Springer International Publishing, 2017.
- 488 [35] Yuqing Zhu and Yu-Xiang Wang. Adaptive private-k-selection with adaptive k and application  
489 to multi-label pate. In Gustau Camps-Valls, Francisco J. R. Ruiz, and Isabel Valera, editors,  
490 *Proceedings of The 25th International Conference on Artificial Intelligence and Statistics*,  
491 volume 151 of *Proceedings of Machine Learning Research*, pages 5622–5635. PMLR, 28–30  
492 Mar 2022.

## 493 A Preliminaries

494 **Notation.** We say that a function  $f$  over datasets is  $t$ -Lipschitz if for any two neighboring dataset  
 495  $D^0, D^1$ , it holds that  $|f(D^1) - f(D^0)| \leq t$ . For two reals  $a, b \geq 0$  and  $\varepsilon > 0$ , we write  $a \approx_\varepsilon b$  if  
 496  $e^{-\varepsilon}b \leq a \leq e^\varepsilon b$ .

497 For two random variables  $X^0, X^1$ , we say that they are  $\varepsilon$ -indistinguishable, denoted  $X^0 \approx_\varepsilon X^1$ ,  
 498 if their max-divergence and symmetric counterpart are both at most  $\varepsilon$ . That is, for  $b \in \{0, 1\}$ ,  
 499  $\max_{S \subseteq \text{supp}(X^b)} \ln \left[ \frac{\Pr[X^b \in S]}{\Pr[X^{1-b} \in S]} \right] \leq \varepsilon$ .

500 We similarly say that for  $\delta > 0$ , the random variables are  $(\varepsilon, \delta)$ -indistinguishable, denoted  $X^0 \approx_{\varepsilon, \delta}$   
 501  $X^1$ , if for  $b \in \{0, 1\}$

$$\max_{S \subseteq \text{supp}(X^b)} \ln \left[ \frac{\Pr[X^b \in S] - \delta}{\Pr[X^{1-b} \in S]} \right] \leq \varepsilon.$$

502 For two probability distributions,  $\mathcal{B}^0, \mathcal{B}^1$  We extend the same notation and write  $\mathbf{B}^0 \approx_\varepsilon \mathbf{B}^1$  and  
 503  $\mathbf{B}^0 \approx_{\varepsilon, \delta} \mathbf{B}^1$  when this holds for random variables drawn from the respective distributions.

504 The following relates  $(\varepsilon, 0)$  and  $(\varepsilon, \delta)$ -indistinguishability with  $\delta = 0$  and  $\delta > 0$ .

505 **Lemma A.1.** *Let  $\mathbf{B}^0, \mathbf{B}^1$  be two distributions. Then  $\mathbf{B}^0 \approx_{\varepsilon, \delta} \mathbf{B}^1$  if and only if we can express them*  
 506 *as mixtures*

$$\mathbf{B}^b \equiv (1 - \delta) \cdot \mathbf{N}^b + \delta \cdot \mathbf{E}^b,$$

507 *where  $\mathbf{N}^0 \approx_\varepsilon \mathbf{N}^1$ .*

508 We treat random variables interchangeably as distributions, and in particular, for a randomized  
 509 algorithm  $\mathcal{A}$  and input  $D$  we use  $\mathcal{A}(D)$  to denote both the random variable and the distribution. We  
 510 say an algorithm  $\mathcal{A}$  is  $\varepsilon$ -DP (pure differential privacy), if for any two *neighboring* datasets  $D$  and  
 511  $D'$ ,  $\mathcal{A}(D) \approx_\varepsilon \mathcal{A}(D')$ . Similarly, we say  $\mathcal{A}$  is  $(\varepsilon, \delta)$ -DP (approximate differential privacy) if for any  
 512 two neighboring datasets  $D, D'$ , it holds that  $\mathcal{A}(D) \approx_{\varepsilon, \delta} \mathcal{A}(D')$  [11]. We refer to  $\varepsilon, \delta$  as the *privacy*  
 513 *parameters*.

514 A *private test* is a differentially private algorithm with Boolean output (say in  $\{0, 1\}$ ).

515 **Remark A.2.** *The literature in differential privacy uses different definitions of neighboring datasets*  
 516 *but in this work the definition and properties are used in a black-box fashion. TCT, and properties in*  
 517 *these preliminaries, apply with an abstraction.*

518 The following is immediate from Lemma A.1:

519 **Corollary A.3** (Decomposition of an approximate DP Algorithm). *An algorithm  $\mathcal{A}$  is  $(\varepsilon, \delta)$ -DP if*  
 520 *and only if for any two neighboring datasets  $D^0$  and  $D^1$  we can represent each distribution  $\mathcal{A}(D^b)$*   
 521 *( $b \in \{0, 1\}$ ) as a mixture*

$$\mathcal{A}(D^b) \equiv (1 - \delta) \cdot \mathbf{N}^b + \delta \cdot \mathbf{E}^b,$$

522 *where  $\mathbf{N}^0 \approx_\varepsilon \mathbf{N}^1$ .*

523 Differential privacy satisfies the post-processing property (post-processing of the output of a private  
 524 algorithm remains private with the same parameter values) and also has nice composition theorems:

525 **Lemma A.4** (DP composition [11, 14]). *An interactive sequence of  $r$  executions of  $\varepsilon$ -DP algorithms*  
 526 *satisfies  $(\varepsilon', \delta)$ -DP for*

527 •  $\varepsilon' = r\varepsilon$  and  $\delta = 0$  by basic composition [11], or

528 • for any  $\delta > 0$ ,

$$\varepsilon' = \frac{1}{2}r\varepsilon^2 + \varepsilon\sqrt{2r \log(1/\delta)}.$$

529 by advanced composition [14].

### 530 A.1 Simulation-based privacy analysis

531 Privacy analysis of an algorithm  $\mathcal{A}$  via simulations is performed by simulating the original algorithm  
 532  $\mathcal{A}$  on two neighboring datasets  $D^0, D^1$ . The simulator does not know which of the datasets is the  
 533 actual input (but knows everything about the datasets). Another entity called the "data holder" has the  
 534 1-bit information  $b \in \{0, 1\}$  on which dataset it is. We perform privacy analysis with respect to what  
 535 the holder discloses to the simulator regarding the private bit  $b$  (taking the maximum over all choices  
 536 of  $D^0, D^1$ ). The privacy analysis is worst case over the choices of two neighboring datasets. This is  
 537 equivalent to performing privacy analysis for  $\mathcal{A}$ .

538 **Lemma A.5** (Simulation-based privacy analysis). [8] *Let  $\mathcal{A}$  be an algorithm whose input is a dataset.*  
 539 *If there exist a pair of interactive algorithms  $\mathcal{S}$  and  $H$  satisfying the following 2 properties, then*  
 540 *algorithm  $\mathcal{A}$  is  $(\varepsilon, \delta)$ -DP.*

1. For every two neighboring datasets  $D^0, D^1$  and for every bit  $b \in \{0, 1\}$  it holds that

$$(\mathcal{S}(D^0, D^1) \leftrightarrow H(D^0, D^1, b)) \equiv \mathcal{A}(D^b).$$

541 Here  $(\mathcal{S}(D^0, D^1) \leftrightarrow H(D^0, D^1, b))$  denotes the outcome of  $\mathcal{S}$  after interacting with  $H$ .

- 542 2. Algorithm  $H$  is  $(\varepsilon, \delta)$ -DP w.r.t. the input bit  $b$ .

### 543 A.2 Privacy Analysis with Failure Events

544 Privacy analysis of a randomized algorithm  $\mathcal{A}$  using designated failure events is as follows:

- 545 1. Designate some runs of the algorithm as *failure events*.
- 546 2. Compute an upper bound on the maximum probability, over datasets  $D$ , of a transcript with  
 547 a failure designation.
- 548 3. Analyse the privacy of the interaction transcript conditioned on no failure designation.

549 Note that the failure designation is only used for the purpose of analysis. The output on failure runs  
 550 is not restricted (e.g., could be the dataset  $D$ )

551 **Lemma A.6** (Privacy analysis with privacy failure events). *Consider privacy analysis of  $\mathcal{A}$  with*  
 552 *failure events. If the probability of a failure event is bounded by  $\delta^* \in [0, 1]$  and the transcript*  
 553 *conditioned on non-failure is  $(\varepsilon', \delta')$ -DP then the algorithm  $\mathcal{A}$  is  $(\varepsilon, \delta + \delta^*)$ -DP.*

554 *Proof.* Let  $D^0$  and  $D^1$  be neighboring datasets. From our assumptions, for  $b \in \{0, 1\}$ , we can  
 555 represent  $\mathcal{A}(D^b)$  as the mixture  $\mathcal{A}(D^b) \equiv (1 - \delta^b) \cdot \mathbf{Z}^b + \delta^b \cdot \mathbf{F}^b$ , where  $\mathbf{Z}^0 \approx_{\varepsilon', \delta'} \mathbf{Z}^1$ , and  $\delta^{(b)} \leq \delta^*$ .  
 556 From Lemma A.1, we have  $\mathbf{Z}^b \equiv (1 - \delta') \cdot \mathbf{N}^b + \delta' \cdot \mathbf{E}^b$ , where  $\mathbf{N}^0 \approx_{\varepsilon'} \mathbf{N}^1$ .

557 Then

$$\begin{aligned} \mathcal{A}(D^b) &= (1 - \delta^{(b)}) \cdot \mathbf{Z}^b + \delta^{(b)} \cdot \mathbf{F}^b \\ &= (1 - \delta^*) \cdot \mathbf{Z}^b + (\delta^* - \delta^{(b)}) \cdot \mathbf{Z}^b + \delta^{(b)} \cdot \mathbf{F}^b \\ &= (1 - \delta^*) \cdot \mathbf{Z}^b + \delta^* \cdot \left( (1 - \delta^{(b)}/\delta^*) \cdot \mathbf{Z}^b + \delta^{(b)} \cdot \mathbf{F}^b \right) \\ &= (1 - \delta^*)(1 - \delta') \cdot \mathbf{N}^b + (1 - \delta^*)\delta' \cdot \mathbf{E}^b + \delta^* \cdot \left( (1 - \delta^{(b)}/\delta^*) \cdot \mathbf{Z}^b + \delta^{(b)} \cdot \mathbf{F}^b \right) \\ &= (1 - \delta^* - \delta') \cdot \mathbf{N}^b + \delta'\delta^* \cdot \mathbf{N} + (1 - \delta^*)\delta' \cdot \mathbf{E}^b + \delta^* \cdot \left( (1 - \delta^{(b)}/\delta^*) \cdot \mathbf{Z}^b + \delta^{(b)} \cdot \mathbf{F}^b \right) \end{aligned}$$

558 The claim follows from Corollary A.3. □

559 Using simulation-based privacy analysis we can treat an interactive sequence of approximate-DP  
 560 algorithms (optionally with designated failure events) as a respective interactive sequence of pure-DP  
 561 algorithms where the  $\delta$  parameters are analysed through failure events. This simplifies analysis:

562 We can relate the privacy of a composition of approximate-DP algorithms to that of a composition of  
 563 corresponding pure-DP algorithms:

564 **Corollary A.7** (Composition of approximate-DP algorithms). *An interactive sequence of  $(\varepsilon_i, \delta_i)$ -DP*  
 565 *algorithms ( $i \in [k]$ ) has privacy parameter values  $(\varepsilon', \delta' + \sum_{i=1}^k \delta_i)$ , where  $(\varepsilon', \delta')$  are privacy*  
 566 *parameter values of a composition of pure  $(\varepsilon_i, 0)$ -DP algorithms  $i \in [k]$ .*

567 *Proof.* We perform simulation-based analysis. Fix two neighboring datasets  $D^0, D^1$ . For an  $(\varepsilon_i, \delta_i)$ -  
 568 DP algorithm, we can consider the mixtures as in Corollary A.3. We draw  $c \sim \text{Ber}(\delta_i)$  and if  $c = 1$   
 569 designate the output as failure and return  $r \sim \mathbf{E}^{(b)}$ . Otherwise, we return  $r \sim \mathbf{N}^{(b)}$ . The overall  
 570 failure probability is bounded by  $1 - \prod_i (1 - \delta_i) \leq \sum_i \delta_i$ . The output conditioned on non-failure is  
 571 a composition of  $(\varepsilon_i, 0)$ -DP algorithms ( $i \in [k]$ ). The claim follows using Lemma A.6.  $\square$

## 572 B The Target-Charging Technique

573 We extend the definition of  $q$ -targets (Definition 2.1) so that it applies with approximate DP algorithms:

574 **Definition B.1** ( $q$ -target with  $(\varepsilon, \delta)$  of a pair of distributions). *Let  $\mathcal{A} \rightarrow \mathcal{Y}$  be a randomized algorithm.*  
 575 *Let  $\mathbf{Z}^0$  and  $\mathbf{Z}^1$  be two distributions with support  $\mathcal{Y}$ . We say that  $\top \subseteq \mathcal{Y}$  is a  $q$ -target of  $(\mathbf{Z}^0, \mathbf{Z}^1)$  with*  
 576  *$(\varepsilon, \delta)$ , where  $\varepsilon > 0$  and  $\delta \in [0, 1]$ , if there exist  $p \in [0, 1]$  and five distributions  $\mathbf{C}, \mathbf{B}^b$ , and  $\mathbf{E}^b$  (for*  
 577  *$b \in \{0, 1\}$ ) such that  $\mathbf{Z}^0$  and  $\mathbf{Z}^1$  can be written as the mixtures*

$$\begin{aligned}\mathbf{Z}^0 &\equiv (1 - \delta) \cdot (p \cdot \mathbf{C} + (1 - p) \cdot \mathbf{B}^0) + \delta \cdot \mathbf{E}^0 \\ \mathbf{Z}^1 &\equiv (1 - \delta) \cdot (p \cdot \mathbf{C} + (1 - p) \cdot \mathbf{B}^1) + \delta \cdot \mathbf{E}^1\end{aligned}$$

578 where  $\mathbf{B}^0 \approx_\varepsilon \mathbf{B}^1$ , and  $\min(\Pr[\mathbf{B}^0 \in \top], \Pr[\mathbf{B}^1 \in \top]) \geq q$ .

579 **Definition B.2** ( $q$ -target with  $(\varepsilon, \delta)$  of a randomized algorithm). *Let  $\mathcal{A} \rightarrow \mathcal{Y}$  be a randomized*  
 580 *algorithm. We say that  $\top \subseteq \mathcal{Y}$  is a  $q$ -target of  $\mathcal{A}$  with  $(\varepsilon, \delta)$ , where  $\varepsilon > 0$  and  $\delta \in [0, 1]$ , if for any*  
 581 *pair  $D^0, D^1$  of neighboring datasets,  $\top$  is a  $q$ -target with  $(\varepsilon, \delta)$  of  $\mathcal{A}(D^0)$  and  $\mathcal{A}(D^1)$ .*

582 We can relate privacy of an algorithms or indistinguishability of two distributions to existence of  
 583  $q$ -targets:

584 **Lemma B.3.** (i) *If  $(\mathbf{Z}^0, \mathbf{Z}^1)$  have a  $q$ -target with  $(\varepsilon, \delta)$  then  $\mathbf{Z}^0 \approx_{\varepsilon, \delta} \mathbf{Z}^1$ . Conversely, if  $\mathbf{Z}^0 \approx_{\varepsilon, \delta} \mathbf{Z}^1$*   
 585 *then  $(\mathbf{Z}^0, \mathbf{Z}^1)$  have a 1-target with  $(\varepsilon, \delta)$  (the full support is a 1-target).*

586 (ii) *If an algorithm  $\mathcal{A}$  has a  $q$ -target with  $(\varepsilon, \delta)$  then  $\mathcal{A}$  is  $(\varepsilon, \delta)$ -DP. Conversely, if an algorithm  $\mathcal{A}$  is*  
 587  *$(\varepsilon, \delta)$ -DP then it has a 1-target (the set  $\mathcal{Y}$ ) with  $(\varepsilon, \delta)$ .*

588 *Proof.* If two distributions  $\mathbf{B}^0, \mathbf{B}^1$  have a  $q$ -target with  $(\varepsilon, \delta)$  than from Definition B.1 they can be  
 589 represented as mixtures. Now observe the if  $\mathbf{B}^0 \approx_\varepsilon \mathbf{B}^1$  then the mixtures also satisfy  $p \cdot \mathbf{C} + (1 -$   
 590  $p) \cdot \mathbf{B}^0 \approx_\varepsilon p \cdot \mathbf{C} + (1 - p) \cdot \mathbf{B}^1$ . Using Lemma A.1, we get  $\mathbf{Z}^0 \approx_{\varepsilon, \delta} \mathbf{Z}^1$ .

591 For (ii) consider  $\mathcal{A}$  and two neighboring datasets  $D^0$  and  $D^1$ . Using Definition B.2 and applying the  
 592 argument above we obtain  $\mathcal{A}(D^0) \approx_{\varepsilon, \delta} \mathcal{A}(D^1)$ . The claim follows using Corollary A.3.

593 Now for the converse. If  $\mathbf{Z}^0 \approx_{\varepsilon, \delta} \mathbf{Z}^1$  then consider the decomposition as in Lemma A.1. Now we set  
 594  $p = 0$  and  $\mathbf{B}^b \leftarrow \mathbf{N}^b$  to obtain the claim with  $q = 1$  and the target being the full support.

595 For (ii), if  $\mathcal{A} \rightarrow \mathcal{Y}$  is  $(\varepsilon, \delta)$ -DP then consider neighboring  $\{D^0, D^1\}$ . We have  $\mathcal{A}(D^0) \approx_{\varepsilon, \delta} \mathcal{A}(D^1)$ .  
 596 We proceed as with the distributions.  $\square$

597 Algorithm 6 is an extension of Algorithm 1 that permits calls to approximate DP algorithms. The  
 598 extension also inputs a bound  $\tau$  on the number of target hits and a bound  $\tau_\delta$  on the cumulative  $\delta$   
 599 parameter values of the algorithms that were called. We apply adaptively a sequence of  $(\varepsilon, \delta)$ -DP  
 600 algorithms with specified  $q$ -targets to the input data set  $D$  and publish the results. We halt when the  
 601 first of the following happens (1) the respective target sets are hit for a specified  $\tau$  number of times  
 602 (2) the accumulated  $\delta$ -values exceed the specified limit  $\tau_\delta$ .

603 The privacy cost of Target-Charging is as follows (This is a precise and more general statement of  
 604 Lemma 2.2):

---

**Algorithm 6:** Target Charging with Approximate DP

---

**Input:** Dataset  $D = \{x_1, \dots, x_n\} \in X^n$ . Integer  $\tau \geq 1$  (Upper limit on the number of target hits).  
 $\tau_\delta \geq 0$  (upper limit on cumulative  $\delta$  parameter). Fraction  $q \in [0, 1]$ .  
 $C \leftarrow 0, C_\delta \leftarrow 0$  // Initialize target hit and failure counters  
**for**  $i = 1, \dots$  **do** // Main loop  
    **Receive**  $(\mathcal{A}_i, \mathbb{T}_i)$  where  $\mathcal{A}_i$  is an  $(\varepsilon, \delta_i)$ -DP mechanism, and  $\mathbb{T}_i$  is a  $q$ -target with  $(\varepsilon, \delta_i)$  for  $\mathcal{A}$   
     $r \leftarrow \mathcal{A}_i(D)$   
    **if**  $C_\delta + \delta_i > \tau_\delta$  **then Halt**  
     $C_\delta \leftarrow C_\delta + \delta_i$  // TCT charge for  $\delta_i$   
    **Publish**  $r$   
    **if**  $r \in \mathbb{T}$  **then** // TCT Charge for a  $q$ -target hit with  $\varepsilon$   
         $C \leftarrow C + 1$   
        **if**  $C = \tau$  **then Halt**

---

---

**Algorithm 7:** Simulation of Target Charging

---

**Input:** Two neighboring datasets  $D^0, D^1$ , private  $b \in \{0, 1\}$ ,  $\tau \in \mathbb{N}$ ,  $\tau_\delta \in \mathbb{R}_{\geq 0}$ ,  $q \in [0, 1]$ ,  $\alpha > 0$ .  
 $C \leftarrow 0, C_\delta \leftarrow 0, h \leftarrow 0$  // Initialize;  $h$  is a counter on the number of non-fail calls to data holder  
**for**  $i = 1, \dots$  **do** // Main loop  
    **Receive**  $(\mathcal{A}_i, \mathbb{T}_i)$  where  $\mathcal{A}_i$  is an  $(\varepsilon, \delta_i)$ -DP mechanism, and  $\mathbb{T}_i$  is a  $q$ -target with  $(\varepsilon, \delta_i)$  for  $\mathcal{A}$   
    **if**  $C_\delta + \delta_i > \tau_\delta$  **then Halt**  
     $C_\delta \leftarrow C_\delta + \delta_i$   
    Let  $p \in [0, 1]$ ,  $\mathbf{C}, \mathbf{B}^0 \approx_\varepsilon \mathbf{B}^1$ , and  $\mathbf{E}^b$  (for  $b \in \{0, 1\}$ ) such that  
     $\mathcal{A}(D^b) \equiv (1 - \delta) \cdot (p \cdot \mathbf{C} + (1 - p) \cdot \mathbf{B}^b) + \delta \cdot \mathbf{E}^b$  // By Definition B.2  
    **if**  $\text{Ber}(\delta) \equiv 1$  **then** // Non-private Data Holder call with Failure  
        **Fail**  
        **Publish**  $r \sim \mathbf{E}^b$   
    **else**  
        **if**  $\text{Ber}(p) \equiv 1$  **then**  
            **Publish**  $r \sim \mathbf{C}$  // No access to data holder  
        **else**  
            **Publish**  $r \sim \mathbf{B}^b$  //  $\varepsilon$ -DP Data Holder Call  
             $h \leftarrow h + 1$  // counter of  $\varepsilon$ -private data holder calls  
            **if**  $h > (1 + \alpha)\tau/q$  **then** // Number of Holder calls exceeded limit  
                **Fail**  
            **if**  $r \in \mathbb{T}$  **then** // outcome is a target hit  
                 $C \leftarrow C + 1$   
                **if**  $C = \tau$  **then Halt**

---

605 **Theorem B.4** (Privacy of Target-Charging). *Algorithm 6 satisfies the following approximate DP*  
606 *privacy bounds:*

$$\left( (1 + \alpha) \frac{\tau}{q} \varepsilon, C_\delta + \delta^*(\tau, \alpha) \right), \quad \text{for any } \alpha > 0;$$
$$\left( \frac{1}{2} (1 + \alpha) \frac{\tau}{q} \varepsilon^2 + \varepsilon \sqrt{(1 + \alpha) \frac{\tau}{q} \log(1/\delta)}, \delta + C_\delta + \delta^*(\tau, \alpha) \right), \quad \text{for any } \delta > 0, \alpha > 0.$$

607 where  $\delta^*(\tau, \alpha) \leq e^{-\frac{\alpha^2}{2(1+\alpha)}\tau}$  and  $C_\delta \leq \tau_\delta$  is as computed by the algorithm.

608 *Proof.* We apply the simulation-based privacy analysis in Lemma A.5 and use privacy analysis with  
609 failure events (Lemma A.6).

610 The simulation is described in Algorithm 7. Fix two neighboring data sets  $D^0$  and  $D^1$ . The simulator  
611 initializes the target hit counter  $C \leftarrow 0$  and the cumulative  $\delta$ -values tracker  $C_\delta \leftarrow 0$ . For  $i \geq 1$  it  
612 proceeds as follows. It receives  $(\mathcal{A}_i, \mathbb{T}_i)$  where  $\mathcal{A}_i$  is  $(\varepsilon, \delta_i)$ -DP. If  $C_\delta + \delta_i > \tau_\delta$  it halts. Since  $\mathbb{T}_i$   
613 is a  $q$ -target for  $\mathcal{A}_i$ , there are  $p, \mathbf{C}, \mathbf{B}^0, \mathbf{B}^1$ , and  $\mathbf{E}^b$  as in Definition B.2. The simulator flips a  
614 biased coin  $c' \sim \text{Ber}(\delta)$ . If  $c' = 1$  it outputs  $r \sim \mathbf{E}^b$  and the execution is designated as **Fail**. In

615 this case there is an interaction with the data holder but also a failure designation. The simulator  
 616 flips a biased coin  $c \sim \text{Ber}(p)$ . If  $c = 1$ , then the simulator publishes a sample  $r \sim \mathbf{C}$  (this does not  
 617 require an interaction with the data holder). Otherwise, the data holder is called. The data holder  
 618 publishes  $r \sim \mathbf{B}^b$ . We track the number  $h$  of calls to the data holder. If  $h$  exceeds  $(1 + \alpha)\tau/q$ , we  
 619 designate the execution as **Fail**. If  $r \in \mathcal{T}_i$  then  $C$  is incremented. If  $C = \tau$ , the algorithm halts.

620 The correctness of the simulation (faithfully simulating Algorithm 1 on the dataset  $D^b$ ) is straightfor-  
 621 ward. We analyse the privacy cost. We will show that

- 622 (i) the simulation designated a failure with probability at most  $C_\delta + \delta^*(\tau, \alpha)$ .
- 623 (ii) Conditioned on no failure designation, the simulation performed at most  $r = (1 + \alpha)\frac{\tau}{q}$   
 624 adaptive calls to  $(\varepsilon, 0)$ -DP algorithms

625 Observe that (ii) is immediate from the simulation declaring failure when  $h > r$ . We will establish (i)  
 626 below.

627 The statement of the Theorem follows from Lemma A.6 and when applying the DP composition  
 628 bounds (Lemma A.4). The first bounds follow using basic composition and the second follow using  
 629 advanced composition [14].

630 This analysis yields the claimed privacy bounds with respect to the private bit  $b$ . From Lemma A.5  
 631 this is the privacy cost of the algorithm.

632 It remains to show bound the failure probability. There are two ways in which a failure can occur.  
 633 The first is on each call, with probability  $\delta_i$ . This probability is bounded by  $1 - \prod_i \delta_i \leq \sum_i \delta_i \leq C_\delta$ .  
 634 The second is when the number  $h$  of private accesses to the data holder exceeds the limit. We show  
 635 that the probability that the algorithm halts with failure due to that is at most  $\delta^*$ .

636 We consider a process that continues until  $\tau$  charges are made. The privacy cost of the simulation  
 637 (with respect to the private bit  $b$ ) depends on the number of times that the data holder is called. Let  $X$   
 638 be the random variable that is the number of calls to the data holder. Each call is  $\varepsilon$ -DP with respect to  
 639 the private  $b$ . In each call, there is probability at least  $q$  for a “charge” (increment of  $C$ ).

640 A failure is the event that the number of calls to data holder exceeds  $(1 + \alpha)\tau/q$  before  $\tau$  charges are  
 641 made. We show that this occurs with probability at most  $\delta^*(\tau, \alpha)$ :

$$\Pr \left[ X > (1 + \alpha)\frac{\tau}{q} \right] \leq \delta^*(\tau, \alpha) . \quad (1)$$

642 To establish (1), we first observe that the distribution of the random variable  $X$  is dominated by a  
 643 random variable  $X'$  that corresponds to a process of drawing i.i.d.  $\text{Ber}(q)$  until we get  $\tau$  successes  
 644 (Domination means that for all  $m$ ,  $\Pr[X' > m] \geq \Pr[X > m]$ ). Therefore, it suffices to establish  
 645 that

$$\Pr \left[ X' > (1 + \alpha)\frac{\tau}{q} \right] \leq \delta^*(\tau, \alpha) .$$

646 Let  $Y$  be the random variable that is a sum of  $m = 1 + \left\lfloor (1 + \alpha)\frac{\tau}{q} \right\rfloor$  i.i.d.  $\text{Ber}(q)$  random variables.  
 647 Note that

$$\Pr \left[ X' > (1 + \alpha)\frac{\tau}{q} \right] = \Pr[Y < \tau] .$$

648 We bound  $\Pr[Y < \tau]$  using multiplicative Chernoff bounds [4]<sup>1</sup>. The expectation is  $\mu = mq$  and  
 649 we bound the probability that the sum of Bernoulli random variables is below  $\frac{1}{1+\alpha}\mu = (1 - \frac{\alpha}{1+\alpha})\mu$ .  
 650 Using the simpler form of the bounds we get using  $\mu = mq \geq (1 + \alpha)\tau$

$$\Pr[Y < \tau] = \Pr[Y < (1 - \frac{\alpha}{1+\alpha})\mu] \leq e^{-\frac{\alpha^2}{2(1+\alpha)^2}\mu} \leq e^{-\frac{\alpha^2}{2(1+\alpha)}\tau} .$$

651

□

---

<sup>1</sup>Bound can be tightened when using precise tail probability values.

**Remark B.5** (Number of target hits). *The TCT privacy analysis has a tradeoff between the final “ $\varepsilon$ ” and “ $\delta$ ” privacy parameters. There is multiplicative factor of  $(1 + \alpha)$  ( $\sqrt{1 + \alpha}$  with advanced composition) on the “ $\varepsilon$ ” privacy parameter. But when we use a smaller  $\alpha$  we need a larger value of  $\tau$  to keep the “ $\delta$ ” privacy parameter small. For a given  $\alpha, \delta^* > 0$ , we can calculate a bound on the smallest value of  $\tau$  that works. We get*

$$\tau \geq 2 \frac{1 + \alpha}{\alpha^2} \cdot \ln(1/\delta^*) \quad (\text{simplified Chernoff})$$

$$\tau \geq \frac{1}{(1 + \alpha) \ln(e^{\alpha/(1+\alpha)}(1 + \alpha)^{-1/(1+\alpha)})} \cdot \ln(1/\delta^*) \quad (\text{raw Chernoff})$$

For  $\alpha = 0.5$  we get  $\tau > 10.6 \cdot \ln(1/\delta^*)$ . For  $\alpha = 1$  we get  $\tau > 3.26 \cdot \ln(1/\delta^*)$ . For  $\alpha = 5$  we get  $\tau > 0.31 \cdot \ln(1/\delta^*)$ .

**Remark B.6** (Mix-and-match TCT). *TCT analysis can be extended to the case where we use algorithms with varied privacy guarantees  $\varepsilon_i$  and varied  $q_i$  values.<sup>2</sup> In this case the privacy cost depends on  $\sum_{i|A_i(D) \in \mathbb{T}_i} \frac{\varepsilon_i}{q_i}$ . The analysis relies on tail bounds on the sum of random variables, is more complex. Varied  $\varepsilon$  values means the random variables have different size supports. A simple coarse bound is according to the largest support, which allows us to use a simple counter for target hits, but may be lossy with respect to precise bounds. The discussion concerns the (analytical or numerical) derivation of tail bounds is non-specific to TCT and is tangential to our contribution.*

## B.1 Multi-Target TCT

Multi-target charging is described in Algorithm 8. We show the following

**Lemma B.7** (Privacy of multi-TCT). *Algorithm 8 satisfies  $(\varepsilon', k\delta')$ -approximate DP bounds, where  $(\varepsilon', \delta')$  are privacy bounds for single-target charging (Algorithm 1).*

Specifically, when we expect that one (index) of multiple outcomes  $\perp_1, \dots, \perp_k$  will dominate our interaction but can not specify which one it is in advance, we can use  $k$ -TCT with NotPrior targets with priors  $\perp_1, \dots, \perp_k$ . From Lemma B.7, the overall privacy cost depends on the number of times that the reported output is different than the most dominant outcome. More specifically, for private testing, when we expect that one type of outcome would dominate the sequence but we do not know if it is 0 or 1, we can apply 2-TCT. The total number of target hits corresponds to the less dominant outcome. The total number of privacy charges (on average) is at most (approximately for small  $\varepsilon$ ) double that, and therefore is always comparable or better to composition (can be vastly lower when there is a dominant outcome).

---

### Algorithm 8: Multi-Target Charging

---

**Input:** Dataset  $D = \{x_1, \dots, x_n\} \in X^n$ . Integer  $\tau \geq 1$  (charging limit). Fraction  $q \in [0, 1]$ ,

$k \geq 1$  (number of targets).

**for**  $i \in [k]$  **do**  $C_i \leftarrow 0$

// Initialize charge counters

**while**  $\min_{i \in [k]} C_i < \tau$  **do**

// Main loop

679     **Receive**  $(\mathcal{A}, (\mathbb{T}_i)_{i \in [k]})$  where  $\mathcal{A}$  is an  $\varepsilon$ -DP mechanism, and  $\mathbb{T}_i$  is a  $q$ -target for  $\mathcal{A}$

$r \leftarrow \mathcal{A}(D)$

**Publish**  $r$

**for**  $i \in [k]$  **do**

**if**  $r \in \mathbb{T}_i$  **then**  $C_i \leftarrow C_i + 1$

// outcome is in  $q$ -target  $\mathbb{T}_i$

---

680 *Proof of Lemma B.7 (Privacy of multi-Target TCT).* <sup>3</sup>Let  $(\varepsilon, \delta)$  be the privacy bounds for  $\mathcal{M}_i$  that is  
681 single-target TCT with  $(\mathcal{A}_i, \mathbb{T}_i)$ . Let  $\mathcal{M}$  be the  $k$ -target algorithm. Let  $\mathbb{T}_i^j$  be the  $i$ th target in step  $j$ .

<sup>2</sup>One of our applications of revise calls to conditional release (see Section D applies TCT with both  $\varepsilon$ -DP and  $2\varepsilon$ -DP algorithms even for base  $\varepsilon$ -DP algorithm)

<sup>3</sup>We note that the claim generally holds for online privacy analysis with the best of multiple methods. We provide a proof specific to multi-target charging below.

682 We say that an outcome sequence  $R = (r_j)_{j=1}^h \in R$  is valid for  $i \in [k]$  if and only if  $\mathcal{M}_i$  would halt  
683 with this output sequence, that is,  $\sum_{j=1}^h \mathbf{1}\{r_j \in \mathbb{T}_i^j\} = \tau$  and  $r_h \in \mathbb{T}_i^h$ . We define  $G(R) \subset [k]$  to be  
684 all  $i \in [k]$  for which  $R$  is valid.

685 Consider a set of sequences  $H$ . Partition  $H$  into  $k + 1$  sets  $H_i$  so that  $H_0 = \{R \in H \mid G(R) = \emptyset\}$   
686 and  $H_i$  may only include  $R \in H$  for which  $i \in G(R)$ . That is,  $H_0$  contains all sequences that are not  
687 valid for any  $i$  and  $H_i$  may contain only sequences that are valid for  $i$ .

$$\begin{aligned} \Pr[\mathcal{M}(D) \in H] &= \sum_{i=1}^k \Pr[\mathcal{M}(D) \in H_i] = \sum_{i=1}^k \Pr[\mathcal{M}_i(D) \in H_i] \\ &\leq \sum_{i=1}^k (e^\varepsilon \cdot \Pr[\mathcal{M}_i(D') \in H_i] + \delta) = e^\varepsilon \cdot \sum_{i=1}^k \Pr[\mathcal{M}_i(D') \in H_i] + k \cdot \delta \\ &= e^\varepsilon \Pr[\mathcal{M}(D') \in H] + k \cdot \delta. \end{aligned}$$

688 □

## 689 C Properties of NotPrior targets

690 Recall that a NotPrior target of an  $(\varepsilon, \delta)$ -DP algorithm is specified by any potential outcome (of  
691 our choice) that we denote by  $\perp$ . The NotPrior target is the set of all outcomes except  $\perp$ . In this  
692 Section we prove (a more general statement of) Lemma 2.3:

693 **Lemma C.1** (Property of a NotPrior target). *Let  $\mathcal{M} : X \rightarrow \mathcal{Y} \cup \{\perp\}$ , where  $\perp \notin \mathcal{Y}$ , be an  
694  $(\varepsilon, \delta)$ -DP algorithm. Then the set of outcomes  $\mathcal{Y}$  constitutes an  $\frac{1}{e^\varepsilon + 1}$ -target with  $(\varepsilon, \delta)$  for  $\mathcal{M}$ .*

695 We will use the following lemma:

696 **Lemma C.2.** *If two distributions  $\mathbf{Z}^0, \mathbf{Z}^1$  with support  $\mathcal{Y} \cup \{\perp\}$  satisfy  $\mathbf{Z}^0 \approx_\varepsilon \mathbf{Z}^1$  then  $\mathcal{Y}$  constitutes  
697 an  $\frac{1}{e^\varepsilon + 1}$ -target with  $(\varepsilon, 0)$  for  $(\mathbf{Z}^0, \mathbf{Z}^1)$ .*

698 *Proof of Lemma 2.3.* From Definition B.2, it suffices to show that for any two neighboring datasets,  
699  $D^0$  and  $D^1$ , the set  $\mathcal{Y}$  is an  $\frac{1}{e^\varepsilon + 1}$ -target with  $(\varepsilon, \delta)$  for  $(\mathcal{M}(D^0), \mathcal{M}(D^1))$  (as in Definition B.1).

700 Consider two neighboring datasets. We have  $\mathcal{M}(D^0) \approx_{\varepsilon, \delta} \mathcal{M}(D^1)$ . Using Lemma A.1, for  
701  $b \in \{0, 1\}$  we can have

$$\mathcal{M}(D^b) = (1 - \delta) \cdot \mathbf{N}^b + \delta \cdot \mathbf{E}^b, \quad (2)$$

702 where  $\mathbf{N}^0 \approx_\varepsilon \mathbf{N}^1$ . From Lemma C.2,  $\mathcal{Y}$  is a  $\frac{1}{e^\varepsilon + 1}$ -target with  $(\varepsilon, 0)$  for  $(\mathbf{N}^0, \mathbf{N}^1)$ . From Defini-  
703 tion B.1 and (2), this means that  $\mathcal{Y}$  is a  $\frac{1}{e^\varepsilon + 1}$ -target with  $(\varepsilon, \delta)$  for  $(\mathcal{M}(D^0), \mathcal{M}(D^1))$ . □

### 704 C.1 Proof of Lemma C.2

705 We first prove Lemma C.2 for the special case of private testing (when the support is  $\{0, 1\}$ ):

706 **Lemma C.3** (target for private testing). *Let  $\mathbf{Z}^0$  and  $\mathbf{Z}^1$  with support  $\{0, 1\}$  satisfy  $\mathbf{Z}^0 \approx_\varepsilon \mathbf{Z}^1$ . Then  
707  $\mathbb{T} = \{1\}$  (or  $\mathbb{T} = \{0\}$ ) is an  $\frac{1}{e^\varepsilon + 1}$ -target with  $(\varepsilon, 0)$  for  $(\mathbf{Z}^0, \mathbf{Z}^1)$ .*

708 *Proof.* We show that Definition B.1 is satisfied with  $\mathbb{T} = \{1\}$ ,  $q = \frac{1}{e^\varepsilon + 1}$  and  $(\varepsilon, 0)$ , and  $\mathbf{Z}^0, \mathbf{Z}^1$ .

$$\begin{aligned} \pi &= \Pr[\mathbf{Z}^0 \in \mathbb{T}] \\ \pi' &= \Pr[\mathbf{Z}^1 \in \mathbb{T}] \end{aligned}$$

709 be the probabilities of  $\mathbb{T}$  outcome in  $\mathbf{Z}^0$  and  $\mathbf{Z}^1$  respectively. Assume without loss of generality  
710 (otherwise we switch the roles of  $\mathbf{Z}^0$  and  $\mathbf{Z}^1$ ) that  $\pi' \geq \pi$ . If  $\pi \geq \frac{1}{e^\varepsilon + 1}$ , the choice of  $p = 0$  and  
711  $\mathbf{B}^b = \mathbf{Z}^b$  (and any  $\mathbf{C}$ ) trivially satisfies the conditions of Definition 2.1. Generally, (also for all  
712  $\pi < \frac{1}{e^\varepsilon + 1}$ ):

713 • Let

$$p = 1 - \frac{\pi' e^\varepsilon - \pi}{e^\varepsilon - 1}.$$

714 Note that since  $\mathbf{Z}^0 \approx_\varepsilon \mathbf{Z}^1$  it follows that  $\pi' \approx_\varepsilon \pi$  and  $(1 - \pi') \approx_\varepsilon (1 - \pi)$  and therefore  
 715  $p \in [0, 1]$  for any applicable  $0 \leq \pi \leq \pi' \leq 1$ .

716 • Let  $\mathbf{C}$  be the distribution with point mass on  $\perp = \{0\}$ .

717 • Let  $\mathbf{B}^0 = \mathbf{Ber}(1 - \frac{\pi' - \pi}{\pi' - e^{-\varepsilon}\pi}) = \mathbf{Ber}(\frac{\pi - \pi e^{-\varepsilon}}{\pi' - e^{-\varepsilon}\pi})$

718 • Let  $\mathbf{B}^1 = \mathbf{Ber}(1 - \frac{\pi' - \pi}{e^\varepsilon \pi' - \pi}) = \mathbf{Ber}(\frac{e^\varepsilon \pi' - \pi'}{e^\varepsilon \pi' - \pi})$

719 We show that this choice satisfies Definition 2.1 with  $q = \frac{1}{e^\varepsilon + 1}$ .

720 • We show that for both  $b \in \{0, 1\}$ ,  $\mathbf{Z}^b \equiv p \cdot \mathbf{C} + (1 - p) \cdot \mathbf{B}^b$ : It suffices to show that the  
 721 probability of  $\perp$  is the same for the distributions on both sides. For  $b = 0$ , the probability of  
 722  $\perp$  in the right hand side distribution is

$$p + (1 - p) \cdot \frac{\pi' - \pi}{\pi' - e^{-\varepsilon}\pi} = 1 - \frac{\pi' e^\varepsilon - \pi}{e^\varepsilon - 1} + \frac{\pi' e^\varepsilon - \pi}{e^\varepsilon - 1} \cdot \frac{\pi' - \pi}{\pi' - e^{-\varepsilon}\pi} = 1 - \pi.$$

723 For  $b = 1$ , the probability is

$$\begin{aligned} p + (1 - p) \cdot \frac{\pi' - \pi}{e^\varepsilon \pi' - \pi} &= 1 - \frac{\pi' e^\varepsilon - \pi}{e^\varepsilon - 1} + \frac{\pi' e^\varepsilon - \pi}{e^\varepsilon - 1} \cdot \frac{\pi' - \pi}{e^\varepsilon \pi' - \pi} \\ &= 1 - \frac{\pi' e^\varepsilon - \pi}{e^\varepsilon - 1} \left( 1 - \frac{\pi' - \pi}{e^\varepsilon \pi' - \pi} \right) \\ &= 1 - \frac{\pi' e^\varepsilon - \pi}{e^\varepsilon - 1} \cdot \frac{e^\varepsilon \pi' - \pi - \pi' + \pi}{e^\varepsilon \pi' - \pi} = 1 - \pi'. \end{aligned}$$

724 • We show that for  $b \in \{0, 1\}$ ,  $\Pr[\mathbf{B}^b \in \top] \geq \frac{1}{e^\varepsilon + 1}$ .

$$\begin{aligned} \Pr[\mathbf{B}^0 \in \top] &= \frac{\pi - e^{-\varepsilon}\pi}{\pi' - e^{-\varepsilon}\pi} \\ &\geq \frac{\pi - e^{-\varepsilon}\pi}{e^\varepsilon \pi - e^{-\varepsilon}\pi} = \frac{e^\varepsilon - 1}{e^{2\varepsilon} - 1} = \frac{1}{e^\varepsilon + 1}. \\ \Pr[\mathbf{B}^1 \in \top] &= \frac{\pi'(e^\varepsilon - 1)}{\pi' e^\varepsilon - \pi} \\ &\geq \frac{\pi(e^\varepsilon - 1)}{\pi e^{2\varepsilon} - \pi} = \frac{e^\varepsilon - 1}{e^{2\varepsilon} - 1} = \frac{1}{e^\varepsilon + 1} \end{aligned}$$

725 Note that the inequalities are tight when  $\pi' = \pi$  (and are tighter when  $\pi'$  is closer to  $\pi$ ).  
 726 This means that our selected  $q$  is the largest possible that satisfies the conditions for the  
 727 target being  $\top$ .

728 • We show that  $\mathbf{B}^0$  and  $\mathbf{B}^1$  are  $\varepsilon$ -indistinguishable, that is

$$\mathbf{Ber}(1 - \frac{\pi' - \pi}{\pi' - e^{-\varepsilon}\pi}) \approx_\varepsilon \mathbf{Ber}(1 - \frac{\pi' - \pi}{e^\varepsilon \pi' - \pi}).$$

729 Recall that  $\mathbf{Ber}(a) \approx_\varepsilon \mathbf{Ber}(b)$  if and only if  $a \approx_\varepsilon b$  and  $(1 - a) \approx_\varepsilon (1 - b)$ . First note that

$$e^{-\varepsilon} \cdot \frac{\pi' - \pi}{\pi' - e^{-\varepsilon}\pi} = \frac{\pi' - \pi}{e^\varepsilon \pi' - \pi}$$

730 Hence

$$\frac{\pi' - \pi}{\pi' - e^{-\varepsilon}\pi} \approx_\varepsilon \frac{\pi' - \pi}{e^\varepsilon \pi' - \pi}.$$

731 It also holds that

$$1 \leq \frac{\frac{\pi - e^{-\varepsilon}\pi}{\pi' - e^{-\varepsilon}\pi}}{\frac{\pi'(1 - e^{-\varepsilon})}{\pi' - e^{-\varepsilon}\pi}} = \frac{\pi'}{\pi} \leq e^\varepsilon.$$

733 *Proof of Lemma C.2.* The proof is very similar to that of Lemma C.3, with a few additional details  
 734 since  $\top = \mathcal{Y}$  can have more than one element (recall that  $\perp$  is a single element).

735 Assume (otherwise we switch roles) that  $\Pr[\mathbf{Z}^0 = \perp] \geq \Pr[\mathbf{Z}^1 = \perp]$ . Let

$$\begin{aligned}\pi &= \Pr[\mathbf{Z}^0 \in \mathcal{Y}] \\ \pi' &= \Pr[\mathbf{Z}^1 \in \mathcal{Y}].\end{aligned}$$

736 Note that  $\pi' \geq \pi$ .

737 We choose  $p$ ,  $\mathbf{C}$ ,  $\mathbf{B}^0$ ,  $\mathbf{B}^1$  as follows. Note that when  $\pi \geq \frac{1}{e^\varepsilon + 1}$ , then the choice of  $p = 0$  and  
 738  $\mathbf{B}^b = \mathbf{Z}^b$  satisfies the conditions. Generally,

739 • Let

$$p = 1 - \frac{\pi' e^\varepsilon - \pi}{e^\varepsilon - 1}.$$

740 • Let  $\mathbf{C}$  be the distribution with point mass on  $\perp$ .

741 • Let  $\mathbf{B}^0$  be  $\perp$  with probability  $\frac{\pi' - \pi}{\pi' - e^{-\varepsilon}\pi}$  and otherwise (with probability  $\frac{\pi - \pi e^{-\varepsilon}}{\pi' - e^{-\varepsilon}\pi}$ ) be  $\mathbf{Z}^0$   
 742 conditioned on the outcome being in  $\mathcal{Y}$ .

743 • Let  $\mathbf{B}^1$  be  $\perp$  with probability  $\frac{\pi' - \pi}{e^\varepsilon \pi' - \pi}$  and otherwise (with probability  $\frac{e^\varepsilon \pi' - \pi}{e^\varepsilon \pi' - \pi}$ ) be  $\mathbf{Z}^1$   
 744 conditioned on the outcome being in  $\mathcal{Y}$ .

745 It remains to show that these choices satisfy Definition 2.1:

746 The argument for  $\Pr[\mathbf{B}^b \in \mathcal{Y}] \geq \frac{e^\varepsilon - 1}{e^{2\varepsilon} - 1}$  is identical to Lemma C.3 (with  $\mathcal{Y} = \top$ ).

747 We next verify that for  $b \in \{0, 1\}$ :  $\mathbf{Z}^b \equiv p \cdot \mathbf{C} + (1 - p) \cdot \mathbf{B}^b$ . The argument for the probability of  $\perp$   
 748 is identical to Lemma C.3. The argument for  $y \in \mathcal{Y}$  follows from the probability of being in  $\mathcal{Y}$  being  
 749 the same and that proportions are maintained.

750 For  $b = 0$ , the probability of  $y \in \mathcal{Y}$  in the right hand side distribution is

$$(1 - p) \cdot \frac{\pi - \pi e^{-\varepsilon}}{\pi' - e^{-\varepsilon}\pi} \cdot \frac{\Pr[\mathbf{Z}^0 = y]}{\Pr[\mathbf{Z}^0 \in \mathcal{Y}]} = \pi \cdot \frac{\Pr[\mathbf{Z}^0 = y]}{\Pr[\mathbf{Z}^0 \in \mathcal{Y}]} = \Pr[\mathbf{Z}^0 = y].$$

751 For  $b = 1$ , the probability of  $y \in \mathcal{Y}$  in the right hand side distribution is

$$\begin{aligned}(1 - p) \cdot \frac{e^\varepsilon \pi' - \pi}{e^\varepsilon \pi' - \pi} \cdot \frac{\Pr[\mathbf{Z}^1 = y]}{\Pr[\mathbf{Z}^1 \in \mathcal{Y}]} &= \pi' \cdot \frac{\Pr[\mathbf{Z}^1 = y]}{\Pr[\mathbf{Z}^1 \in \mathcal{Y}]} \\ &= \Pr[\mathbf{Z}^1 = y].\end{aligned}$$

752 Finally, we verify that  $\mathbf{B}^0$  and  $\mathbf{B}^1$  are  $\varepsilon$ -indistinguishable. Let  $W \subset \mathcal{Y}$ . We have

$$\begin{aligned}\Pr[\mathbf{B}^0 \in W] &= \frac{\pi(1 - e^{-\varepsilon})}{\pi' - e^{-\varepsilon}\pi} \cdot \frac{\Pr[\mathbf{Z}^0 \in W]}{\pi} = \frac{e^\varepsilon - 1}{\pi' e^\varepsilon - \pi} \Pr[\mathbf{Z}^0 \in W] \\ \Pr[\mathbf{B}^1 \in W] &= \frac{\pi'(e^\varepsilon - 1)}{e^\varepsilon \pi' - \pi} \cdot \frac{\Pr[\mathbf{Z}^1 \in W]}{\pi'} = \frac{e^\varepsilon - 1}{\pi' e^\varepsilon - \pi} \Pr[\mathbf{Z}^1 \in W].\end{aligned}$$

753 Therefore

$$\frac{\Pr[\mathbf{B}^0 \in W]}{\Pr[\mathbf{B}^1 \in W]} = \frac{\Pr[\mathbf{Z}^0 \in W]}{\Pr[\mathbf{Z}^1 \in W]}$$

754 and we use  $\mathbf{Z}^0 \approx_\varepsilon \mathbf{Z}^1$ . The case of  $W = \perp$  is identical to the proof of Lemma C.3. The case  $\perp \in W$   
 755 follows. □

## D Conditional Release with Revisions

In this section we analyze an extension to conditional release that allows for revision calls to be made with respect to *previous* computations. This extension was presented in Section 2.3 and described in Algorithm 2. A conditional release applies a private algorithm  $\mathcal{A} \rightarrow \mathcal{Y}$  with respect to a subset of outcomes  $\top \subset \mathcal{Y}$ . It draws  $y \sim \mathcal{A}(D)$  and returns  $y$  if  $y \in \top$  and  $\perp$  otherwise. Each revise calls effectively expands the target to  $\top_h \cup \top'$ , when  $\top_h$  is the prior target and  $\top'$  a disjoint extension. If the (previously) computed result hits the expanded target ( $y \in \top'$ ), the value  $y$  is reported and charged. Otherwise, additional revise calls can be performed. The revise calls can be interleaved with other TCT computations at any point in the interaction.

### D.1 Preliminaries

For a distribution  $\mathbf{Z}$  with support  $\mathcal{Y}$  and  $W \subset \mathcal{Y}$  we denote by  $\mathbf{Z}_W$  the distribution with support  $W \cup \{\perp\}$  where outcomes not in  $W$  are “replaced” by  $\perp$ . That is, for  $y \in W$ ,  $\Pr[\mathbf{Z}_W = y] := \Pr[\mathbf{Z} = y]$  and  $\Pr[\mathbf{Z}_W = \perp] := \Pr[\mathbf{Z} \notin W]$ .

For a distribution  $\mathbf{Z}$  with support  $\mathcal{Y}$  and  $W \subset \mathcal{Y}$  we denote by  $\mathbf{Z} \mid W$  the *conditional distribution* of  $\mathbf{Z}$  on  $W$ . That is, for  $y \in W$ ,  $\Pr[(\mathbf{Z} \mid W) = y] := \Pr[\mathbf{Z} = y] / \Pr[\mathbf{Z} \in W]$ .

**Lemma D.1.** *If  $\mathbf{B}^0 \approx_{\varepsilon, \delta} \mathbf{B}^1$  then  $\mathbf{B}_W^0 \approx_{\varepsilon, \delta} \mathbf{B}_W^1$ .*

**Lemma D.2.** *Let  $\mathbf{B}^0, \mathbf{B}^1$  be probability distributions with support  $\mathcal{Y}$  such that  $\mathbf{B}^0 \approx_{\varepsilon} \mathbf{B}^1$ . Let  $W \subset \mathcal{Y}$ . Then  $\mathbf{B}^0 \mid W \approx_{2\varepsilon} \mathbf{B}^1 \mid W$ .*

We extend these definitions to a randomized algorithm  $\mathcal{A}$ , where  $\mathcal{A}_W(D)$  has distribution  $\mathcal{A}(D)_W$  and  $(\mathcal{A} \mid W)(D)$  has distribution  $\mathcal{A}(D) \mid W$ . The claims in Lemma D.1 and Lemma D.2 then transfer to privacy of the algorithms.

### D.2 Analysis

To establish correctness, it remains to show that each `ConditionalRelease` call with an  $(\varepsilon, \delta)$ -DP algorithm  $\mathcal{A}$  can be casted in TCT as a call to an  $(\varepsilon, \delta)$ -DP algorithm with a `NotPrior` target and each `ReviseCR` call can be casted as a call to an  $2\varepsilon$ -DP algorithm with a `NotPrior` target.

*Proof of Lemma 2.5.* The claim for `ConditionalRelease` was established in Lemma 2.4: `ConditionalRelease` ( $\mathcal{A}, \top$ ) calls the algorithm  $\mathcal{A}_{\top}$  with target  $\top$ . From Lemma D.1,  $\mathcal{A}_{\top}$  is  $(\varepsilon, \delta)$ -DP when  $\mathcal{A}$  is  $(\varepsilon, \delta)$ -DP.  $\top$  constitutes a `NotPrior` target for  $\mathcal{A}_{\top}$  with respect to prior  $\perp$ .

We next consider revision calls as described in Algorithm 2. We first consider the case of a pure-DP  $\mathcal{A}$  ( $\delta = 0$ ).

When `ConditionalRelease` publishes  $\perp$ , the internally stored value  $r_h$  conditioned on published  $\perp$  is a sample from the conditional distribution  $\mathcal{A}(D) \mid \neg \top$ .

We will show by induction that this remains true after `ReviseCR` calls, that is the distribution of  $r_h$  conditioned on  $\perp$  being returned in all previous calls is  $\mathcal{A}(D) \mid \neg \top_h$  where  $\top_h$  is the current expanded target.

An `ReviseCR` call with respect to current target  $\top_h$  and extension  $\top'$  can be equivalently framed as drawing  $r \sim \mathcal{A}(D) \mid \neg \top_h$ . From Lemma D.2, if  $\mathcal{A}$  is  $\varepsilon$ -DP then  $\mathcal{A} \mid \neg \top_h$  is  $2\varepsilon$ -DP. If  $r \in \top'$  we publish it and otherwise we publish  $\perp$ . This is a conditional release computation with respect to the  $2\varepsilon$ -DP algorithm  $\mathcal{A} \mid \neg \top_h$  and the target  $\top'$ . Equivalently, it is a call to the  $2\varepsilon$ -DP algorithm  $(\mathcal{A} \mid \neg \top_h)_{\top'}$  with a `NotPrior` target  $\top'$ .

Following the `ReviseCR` call, the conditional distribution of  $r_h$  conditioned on  $\perp$  returned in the previous calls is  $\mathcal{A}(D) \mid \neg(\top_h \cup \top')$  as claimed. We then update  $\top_h \leftarrow \top_h \cup \top'$ .

It remains to handle the case  $\delta > 0$ . We consider `ReviseCR` calls for the case where  $\mathcal{A}$  is  $(\varepsilon, \delta)$ -DP (approximate DP). In this case, we want to show that we charge for the  $\delta$  value once, only on the original `ConditionalRelease` call. We apply the simulation-based analysis in the proof of Theorem B.4 with two fixed neighboring datasets. Note that this can be viewed as each call being with a pair of distributions with an appropriate  $q$ -target (that in our case is always a `NotPrior` target).

804 The first ConditionalRelease call uses the distributions  $\mathcal{A}(D^0)$  and  $\mathcal{A}(D^1)$ . From Lemma A.1  
 805 they can be expressed as respective mixtures of pure  $\mathbf{N}^0 \approx_\varepsilon \mathbf{N}^1$  part (with probability  $1 - \delta$ ) and  
 806 non-private parts. The non-private draw is designated failure with probability  $\delta$ . Effectively, the call  
 807 in the simulation is then applied to the pair  $(\mathbf{N}_\top^0, \mathbf{N}_\top^1)$  with target  $\top$ .

808 A followup ReviseCR call is with respect to the previous target  $\top_h$  and target extension  $\top'$ . The  
 809 call is with the distributions  $(\mathbf{N}^b \mid \neg \top_h)_{\top'}$  that using Lemma D.1 and Lemma D.2 satisfy  $(\mathbf{N}^0 \mid$   
 810  $\neg \top_h)_{\top'} \approx_{2\varepsilon} (\mathbf{N}^1 \mid \neg \top_h)_{\top'}$ .  $\square$

## 811 E Boundary Wrapper Analysis

812 In this section we provide details for the boundary wrapper method including proofs of Lemma 2.7  
 813 and Lemma 2.8. For instructive reasons, we first consider the special case of private testing and then  
 814 outline the extensions to private classification.

815 Algorithm 4 when specialized for tests first computes  $\pi(D) = \min\{\Pr[\mathcal{A}(D) = 0], 1 - \Pr[\mathcal{A}(D) =$   
 816  $0]\}$ , returns  $\top$  with probability  $\pi/(1 + \pi)$  and otherwise (with probability  $1/(1 + \pi)$ ) return  $\mathcal{A}(D)$ .  
 817 Overall, we return the less likely outcome with probability  $\pi/(1 + \pi)$ , and the more likely one with  
 818 probability  $(1 - \pi)/(1 + \pi)$ .

819 **Lemma E.1** (Privacy of wrapped test). *If the test is  $\varepsilon$ -DP then the wrapper test is  $t(\varepsilon)$ -DP where*  
 820  *$t(\varepsilon) \leq \frac{4}{3}\varepsilon$ .*

821 *Proof.* Working directly with the definitions,  $t(\varepsilon)$  is the maximum of

$$\max_{\pi \in (0, 1/2)} \left| \ln \left( \frac{1 - e^{-\varepsilon}\pi}{1 + e^{-\varepsilon}\pi} \cdot \frac{1 + \pi}{1 - \pi} \right) \right| \leq \frac{4}{3}\varepsilon \quad (3)$$

$$\max_{\pi \in (0, 1/2)} \left| \ln \left( \frac{e^{-\varepsilon}\pi}{1 + e^{-\varepsilon}\pi} \cdot \frac{1 + \pi}{\pi} \right) \right| \leq \varepsilon \quad (4)$$

$$\max_{\pi \in (\frac{e^{-\varepsilon}}{2}, \frac{1}{1+e^\varepsilon})} \left| \ln \left( \frac{\pi}{1 + \pi} \cdot \frac{2 - e^\varepsilon\pi}{e^\varepsilon\pi} \right) \right| \leq \varepsilon \quad (5)$$

$$\max_{\pi \in (\frac{e^{-\varepsilon}}{2}, \frac{1}{1+e^\varepsilon})} \left| \ln \left( \frac{1 - \pi}{1 + \pi} \cdot \frac{2 - e^\varepsilon\pi}{1 - e^\varepsilon\pi} \right) \right| \leq \frac{4}{3}\varepsilon \quad (6)$$

$$\max_{\pi \in (\frac{e^{-\varepsilon}}{2}, \frac{1}{1+e^\varepsilon})} \left| \ln \left( \frac{\pi}{1 + \pi} \cdot \frac{2 - e^\varepsilon\pi}{1 - e^\varepsilon\pi} \right) \right| \leq \varepsilon \quad (7)$$

822 Inequality (3) bounds the ratio change in the probability of the larger probability outcome when it  
 823 remains the same and (4) the ratio change in the probability of the smaller probability outcome when  
 824 it remains the same between the neighboring datasets. When the less probable outcome changes  
 825 between the neighboring datasets it suffices to consider the case where the probability of the initially  
 826 less likely outcome changes to  $e^\varepsilon\pi > 1/2$  so that  $e^\varepsilon\pi < 1 - \pi$ , that is the change is from  $\pi$  to  $e^\varepsilon\pi$   
 827 where  $\pi \in (\frac{e^{-\varepsilon}}{2}, \frac{1}{1+e^\varepsilon})$ . Inequalities 5 and 6 correspond to this case. The wrapped probabilities of  
 828 the  $\top$  outcome are the same as the less probable outcome in the case that it is the same in the two  
 829 databases. Inequality 7 corresponds to the case when there is change.  $\square$

830 We now show that  $\top$  is a target for the wrapped test.

831 **Lemma E.2** ( $q$ -value of the boundary target). *The outcome  $\top$  of a boundary wrapper of an  $\varepsilon$ -DP test*  
 832 *is a  $\frac{e^{t(\varepsilon)} - 1}{2(e^\varepsilon + t(\varepsilon) - 1)}$ -target.*

833 *Proof.* Consider two neighboring datasets where the same outcome is less likely for both and  $\pi \leq \pi'$ .  
 834 Suppose without loss of generality that 0 is the less likely outcome.

835 The common distribution  $(C)$  has point mass on 1.

836 The distribution  $\mathbf{B}^0$  is a scaled part of  $\mathcal{M}(D^0)$  that includes all 0 and  $\top$  outcomes (probability  
 837  $\pi/(1 + \pi)$  each) and probability of  $\Delta \frac{e^{t(\varepsilon)}}{e^{t(\varepsilon)} - 1}$  of the 1 outcomes, where  $\Delta = \frac{2\pi'}{1 + \pi'} - \frac{2\pi}{1 + \pi}$ .

838 The distribution  $\mathbf{B}^1$  is a scaled part of  $\mathcal{M}(D^1)$  that includes all 0 and  $\top$  outcomes (probability  
839  $\pi'/(1 + \pi')$  each) and probability of  $\Delta \frac{1}{e^{t(\varepsilon)} - 1}$  of the 1 outcomes.

840 It is easy to verify that  $\mathbf{B}^0 \approx_{t(\varepsilon)} \mathbf{B}^1$  and that

$$\begin{aligned} 1 - p &= \frac{2\pi'}{1 + \pi'} + \Delta \frac{1}{e^{t(\varepsilon)} - 1} = \frac{2\pi}{1 + \pi} + \Delta \frac{e^{t(\varepsilon)}}{e^{t(\varepsilon)} - 1} \\ &= \frac{2\pi'}{1 + \pi'} \frac{e^{t(\varepsilon)}}{e^{t(\varepsilon)} - 1} - \frac{2\pi}{1 + \pi} \frac{1}{e^{t(\varepsilon)} - 1} \\ &= \frac{2}{e^{t(\varepsilon)} - 1} \left( e^{t(\varepsilon)} \frac{\pi'}{1 + \pi'} - \frac{\pi}{1 + \pi} \right) \end{aligned}$$

841 Using  $\frac{\pi}{1 + \pi} \leq \frac{\pi'}{1 + \pi'}$  and  $\frac{\pi'}{1 + \pi'} \leq e^\varepsilon$  we obtain

$$\begin{aligned} q &\geq \frac{\frac{\pi}{1 + \pi}}{1 - p} \\ &= \frac{e^{t(\varepsilon)} - 1}{2} \left( \frac{1}{e^{t(\varepsilon)} \cdot \frac{\pi'}{1 + \pi'} \cdot \frac{1 + \pi}{\pi} - 1} \right) \\ &\geq \frac{e^{t(\varepsilon)} - 1}{2} \frac{1}{e^{t(\varepsilon) + \varepsilon} - 1}. \end{aligned}$$

842

□

843 **Extension to Private Classification** To extension from Lemma E.1 to Lemma 2.7 follows by  
844 noting that the same arguments also hold respectively for sets of outcomes and also cover the case  
845 when there is no dominant outcome and when there is a transition between neighboring datasets from  
846 no dominant outcome to a dominant outcome. The extension from Lemma E.1 to Lemma 2.7 is  
847 also straightforward by also noting the cases above (that only make the respective  $\Delta$  smaller), and  
848 allowing  $\mathbf{C}$  to be empty when there is no dominant outcome.

## 849 F Boundary wrapping without a probability oracle

850 We present a boundary-wrapping method that does not assume a probability oracle. This method  
851 accesses the distribution  $\mathcal{A}(D)$  in a blackbox fashion.

852 At a very high level, we show that one can run an  $(\varepsilon, 0)$ -DP algorithm  $\mathcal{A}$  twice and observe both  
853 outcomes. Then, denote by  $\mathcal{Y}$  the range of the algorithm  $\mathcal{A}$ . We can show that  $E = \{(y, y') : y \neq$   
854  $y'\} \subseteq \mathcal{Y} \times \mathcal{Y}$  is an  $\Omega(1)$ -target of this procedure. That is, if the analyst observes the same outcome  
855 twice, she learns the outcome “for free”. If the two outcomes are different, the analyst pays  $O(\varepsilon)$  of  
856 privacy budget, but she will be able to access both outcomes, which is potentially more informative  
857 than a single execution of the algorithm.

858 **Lemma F.1.** *Suppose  $\mathcal{A} : \mathcal{X}^* \rightarrow \mathcal{Y}$  is an  $(\varepsilon, 0)$ -DP algorithm where  $|\mathcal{Y}| < \infty$ . Denote by  $\mathcal{A} \circ \mathcal{A}$   
859 the following algorithm: on input  $D$ , independently run  $\mathcal{A}$  twice and publish both outcomes. Define  
860  $E := \{(y, y') : y \neq y'\} \subseteq \mathcal{Y} \times \mathcal{Y}$ . Then,  $\mathcal{A} \circ \mathcal{A}$  is a  $(2\varepsilon, 0)$ -DP algorithm, and  $E$  is a  $f(\varepsilon)$ -target  
861 for  $\mathcal{A} \circ \mathcal{A}$ , where*

$$f(\varepsilon) = 1 - \sqrt{e^{2\varepsilon}/(1 + e^{2\varepsilon})}.$$

862 *Proof.*  $\mathcal{A} \circ \mathcal{A}$  is  $(2\varepsilon, 0)$ -DP by the basic composition theorem. Next, we verify the second claim.

863 Identify elements of  $\mathcal{Y}$  as  $1, 2, \dots, m = |\mathcal{Y}|$ . Let  $D, D'$  be two adjacent data sets. For each  $i \in [m]$ ,  
864 let

$$p_i = \Pr[\mathcal{A}(D) = i], \quad p'_i = \Pr[\mathcal{A}(D') = i].$$

865 We define a distribution  $\mathbf{C}$ . For each  $i \in [m]$ , define  $q_i$  to be the largest real such that

$$p_i^2 - q_i \in [e^{-2\varepsilon}(p_i'^2 - q_i), e^{2\varepsilon}(p_i'^2 - q_i)].$$

866 Then, we define  $\mathbf{C}$  to be a distribution over  $\{(i, i) : i \in [m]\}$  where  $\Pr[\mathbf{C} = (i, i)] = \frac{q_i}{\sum_j q_j}$ .

867 We can then write  $(\mathcal{A} \circ \mathcal{A})(D) = \alpha \cdot \mathbf{C} + (1 - \alpha) \cdot \mathbf{N}^0$  and  $(\mathcal{A} \circ \mathcal{A})(D') = \alpha \cdot \mathbf{C} + (1 - \alpha) \cdot \mathbf{N}^1$ ,  
 868 where  $\alpha = \sum_i q_i$ , and  $\mathbf{N}^0$  and  $\mathbf{N}^1$  are  $2\varepsilon$ -indistinguishable.

869 Next, we consider lower-bounding  $\Pr[\mathbf{N}^0 = (y, y') : y \neq y']$ . The lower bound of  $\Pr[\mathbf{N}^0 = (y, y') : y \neq y']$  will follow from the same argument.

871 Indeed, we have

$$\frac{\Pr[\mathbf{N}^0 = (y, y') : y \neq y']}{\Pr[\mathbf{N}^0 = (y, y)]} = \frac{\sum_i p_i(1 - p_i)}{\sum_i p_i^2 - q_i}.$$

872 We claim that

$$p_i^2 - q_i \leq 1 - p_i'^2.$$

873 The inequality is trivially true if  $p_i^2 \leq 1 - p_i'^2$ . Otherwise, we can observe that for  $q := p_i^2 + p_i'^2 - 1 >$   
 874 0, we have  $p_i^2 - q = 1 - p_i'^2$  and  $p_i'^2 - q = 1 - p_i^2$ . Since  $1 - p_i'^2 \in [e^{-2\varepsilon}(1 - p_i^2), e^{2\varepsilon}(1 - p_i^2)]$ ,  
 875 this implies that  $q_i$  can only be larger than  $q$ .

876 Since we also trivially have that  $p_i^2 - q_i \leq p_i^2$ , we conclude that

$$\frac{\Pr[\mathbf{N}^0 = (y, y') : y \neq y']}{\Pr[\mathbf{N}^0 = (y, y)]} \geq \frac{\sum_i p_i(1 - p_i)}{\sum_i \min(p_i^2, 1 - p_i'^2)} \geq \frac{\sum_i p_i(1 - p_i)}{\sum_i \min(p_i^2, e^{2\varepsilon}(1 - p_i^2))}.$$

877 Next, it is straightforward to show that, for every  $p \in [0, 1]$ , one has

$$\frac{p(1 - p)}{\min(p^2, e^{2\varepsilon}(1 - p^2))} = \min\left(\frac{1 - p}{p}, \frac{p}{e^{2\varepsilon}(1 + p)}\right) \geq \frac{1 - \sqrt{e^{2\varepsilon}/(1 + e^{2\varepsilon})}}{\sqrt{e^{2\varepsilon}/(1 + e^{2\varepsilon})}}.$$

878 Consequently,

$$\Pr[\mathbf{N}^0 = (y, y') : y \neq y'] = \frac{\Pr[\mathbf{N}^0 = (y, y') : y \neq y']}{\Pr[\mathbf{N}^0 = (y, y') : y \neq y'] + \Pr[\mathbf{N}^0 = (y, y)]} \geq 1 - \sqrt{e^{2\varepsilon}/(1 + e^{2\varepsilon})},$$

879 as desired.  $\square$

880 **Remark F.2.** For a typical use case where  $\epsilon = 0.1$ , we have  $f(\epsilon) \approx 0.258$ . Then, by applying  
 881 Theorem B.4, on average we pay  $\approx 8\epsilon$  privacy cost for each target hit. Improving the constant of 8  
 882 is a natural question for future research. We also note that while the overhead is more significant  
 883 compared to the boundary wrapper of Algorithm 4, the output is more informative as it includes two  
 884 independent responses of the core algorithm whereas Algorithm 4 returns one or none (when  $\top$  is  
 885 returned). We expect that it is possible to design less-informative boundary wrappers for the case of  
 886 blackbox access (no probability oracle) that have a lower overhead. We leave this as an interesting  
 887 question for followup work.

## 888 G $q$ value for BetweenThresholds

889 We provide details for the BetweenThresholds classifier (see Section 2.6). The  
 890 BetweenThresholds classifier is a refinement of AboveThreshold. It is specified by a 1-  
 891 Lipschitz function  $f$ , two thresholds  $t_\ell < t_r$ , and a privacy parameter  $\varepsilon$ . We compute  $\tilde{f}(D) =$   
 892  $f(D) + \text{Lap}(1/\varepsilon)$ , where  $\text{Lap}$  is the Laplace distribution. If  $\tilde{f}(D) < t_\ell$  we return L. If  $\tilde{f}(D) > t_r$   
 893 we return H. Otherwise, we return  $\top$ .

894 **Lemma G.1** (Effectiveness of the “between” target). *The  $\top$  outcome is an  $(1 - e^{-(t_r - t_\ell)\varepsilon}) \cdot \frac{e^\varepsilon - 1}{e^{2\varepsilon} - 1}$ -*  
 895 *target for BetweenThresholds.*

896 *Proof.* Without loss of generality we assume that  $t_\ell = 0$  and  $t_r = t/\varepsilon$ .

897 Consider two neighboring data sets  $D^0$  and  $D^1$  and the respective  $f(D^0)$  and  $f(D^1)$ . Since  $f$  is  
 898 1-Lipschitz, we can assume without loss of generality (otherwise we switch the roles of the two data

sets) that  $f(D^0) \leq f(D^1) \leq f(D^0) + 1$ . Consider the case  $f(D^1) \leq 0$ . The case  $f(D^0) \geq t/\varepsilon$  is symmetric and the cases where one or both of  $f(D^b)$  are in  $(0, t/\varepsilon)$  make  $\perp$  a more effective target.

$$\pi_L^b := \Pr[f(D^b) + \mathbf{Lap}(1/\varepsilon) < t_\ell = 0] = 1 - \frac{1}{2}e^{-|f(D^b)|\varepsilon}$$

$$\pi_H^b := \Pr[f(D^b) + \mathbf{Lap}(1/\varepsilon) > t_r = t/\varepsilon] = \frac{1}{2}e^{-(|f(D^b)|\varepsilon - t)}$$

$$\pi_\top^b := \Pr[f(D^b) + \mathbf{Lap}(1/\varepsilon) \in (0, t/\varepsilon)] = \frac{1}{2} \left( e^{-|f(D^b)|\varepsilon} - e^{-(|f(D^b)|\varepsilon - t)} \right) = \frac{1}{2}e^{-|f(D^b)|\varepsilon}(1 - e^{-t})$$

Note that  $\pi_L^0 \approx_\varepsilon \pi_L^1$  and  $\pi_H^1 \approx_\varepsilon \pi_H^0$ ,  $\pi_L^0 \geq \pi_L^1$  and  $\pi_H^1 \geq \pi_H^0$

We set

$$p = \left( \pi_L^1 - \frac{1}{e^\varepsilon - 1}(\pi_L^0 - \pi_L^1) \right) + \left( \pi_H^0 - \frac{1}{e^\varepsilon - 1}(\pi_H^1 - \pi_H^0) \right)$$

and the distribution  $\mathbf{C}$  to be  $\mathbf{L}$  with probability  $(\pi_L^1 - \frac{1}{e^\varepsilon - 1}(\pi_L^0 - \pi_L^1))/p$  and  $\mathbf{H}$  otherwise.

We specify  $p$  and the distributions  $\mathbf{B}^b$  and  $\mathbf{C}$  as we did for `NotPrior` (Lemma 2.3) with respect to “prior”  $\mathbf{L}$ . (We can do that and cover also the case where  $f(D^0) > t/\varepsilon$  where the symmetric prior would be  $\mathbf{H}$  because the target does not depend on the values being below or above the threshold.)

The only difference is that our target is smaller, and includes only  $\top$  rather than  $\top$  and  $\mathbf{H}$ . Because of that, the calculated  $q$  value is reduced by a factor of

$$\frac{\pi_\top^b}{\pi_\top^b + \pi_H^b} = \frac{\frac{1}{2}e^{-|f(D^b)|\varepsilon}(1 - e^{-t})}{\frac{1}{2}e^{-|f(D^b)|\varepsilon}} = (1 - e^{-t}).$$

□

## H Analysis of SVT with individual privacy charging

We provide the privacy analysis for SVT with individual privacy charging (see Section 2.8).

Our improved SVT with individual charging is described in Algorithm 5. We establish the following privacy guarantee:

**Theorem H.1** (Privacy of Algorithm 5). *Assume  $\varepsilon < 1$ . Algorithm 5 is  $(O(\sqrt{\tau \log(1/\delta)}\varepsilon, 2^{-\Omega(\tau)} + \delta)$ -DP for every  $\delta \in (0, 1)$ .*

*Proof of Theorem H.1.* We apply simulation-based privacy analysis (see Section A.5). Consider two neighboring datasets  $D$  and  $D' = D \cup \{x\}$ . The only queries where potentially  $f(D) \neq f(D')$  and we may need to call the data holder are those with  $f(x) \neq 0$ . Note that for every  $x' \in D$ , the counter  $C_{x'}$  is the same during the execution of Algorithm 5 on either  $D$  or  $D'$ . This is because the update of  $C_{x'}$  depends only on the published results and  $f_i(x')$ , both of which are public information. Hence, we can think of the processing of  $C_{x'}$  as a post-processing when we analyze the privacy property between  $D$  and  $D'$ .

After  $x$  is removed, the response on  $D$  and  $D'$  is the same, and the data holder does not need to be called. Before  $x$  is removed from  $D'$ , we need to consider the queries such that  $f(x) \neq 0$  while  $C_x < \tau$ . Note that this is equivalent to a sequence of `AboveThreshold` tests to linear queries, we apply TCT analysis with `ConditionalRelease` applied with above threshold responses. The claim follows from Theorem B.4. □

We also add that Algorithm 5 can be implemented with `BetweenThresholds` test (see Section 2.6), the extension is straightforward with the respective privacy bounds following from Lemma G.1 ( $q$  value for target hit).

## I Private Selection

In this section we provide proofs and additional details for private selection in TCT (Sections 2.4 and 2.4.1). Let  $\mathcal{A}_1, \dots, \mathcal{A}_m$  be of  $m$  private algorithms that return results with quality scores. The

private selection task asks us to select the best algorithm from the  $m$  candidates. The one-shot selection described in Algorithm 3 (with  $k = 1$ ) runs each algorithm once and returns the response with highest quality.

It is shown in [21] that if each  $\mathcal{A}_i$  is  $(\varepsilon, 0)$ -DP then the one-shot selection algorithm degrades the privacy bound to  $(m\varepsilon, 0)$ -DP. However, if we relax the requirement to approximate DP, we can show that one-shot selection is  $(O(\log(1/\delta)\varepsilon), \delta)$ -DP, which is independent of  $m$  (the number of candidates). Moreover, in light of a lower-bound example by [21], Theorem I.1 is tight up to constant factors.

Formally, our theorem can be stated as

**Theorem I.1.** Suppose  $\varepsilon < 1$ . Let  $\mathcal{A}_1, \dots, \mathcal{A}_m : X^n \rightarrow \mathcal{Y} \times \mathbb{R}$  be a list of  $(\varepsilon, \delta_i)$ -DP algorithms, where the output of  $\mathcal{A}_i$  consists of a solution  $y \in \mathcal{Y}$  and a score  $s \in \mathbb{R}$ . Denote by  $\text{Best}(\mathcal{A}_1, \dots, \mathcal{A}_m)$  the following algorithm (Algorithm 3 with  $k = 1$ ): run each  $\mathcal{A}_1, \dots, \mathcal{A}_m$  once, get  $m$  results  $(y_1, s_1), \dots, (y_m, s_m)$ , and output  $(y_{i^*}, s_{i^*})$  where  $i^* = \arg \max_i s_i$ .

Then, for every  $\delta \in (0, 1)$ ,  $\text{Best}(\mathcal{A}_1, \dots, \mathcal{A}_m)$  satisfies  $(\varepsilon', \delta')$ -DP where  $\varepsilon' = O(\varepsilon \log(1/\delta))$ ,  $\delta' = \delta + \sum_i \delta_i$ .

*Proof. Discrete scores.* We start by considering the case that the output scores from  $\mathcal{A}_1, \dots, \mathcal{A}_m$  always lie in a finite set  $X \subseteq \mathbb{R}$ . The case with continuous scores can be analyzed by a discretization argument.

Fix  $D^0, D^1$  to be a pair of adjacent data sets. We consider the following implementation of the vanilla private selection.

---

**Algorithm 9:** Private Selection: A Simulation

---

**Input:** Private data set  $D$ . The set  $X$  defined above.

```

for  $i = 1, \dots, m$  do
   $(y_i, s_i) \leftarrow \mathcal{A}_i(D)$ 
for  $\hat{s} \in X$  in the decreasing order do
  for  $i = 1, \dots, m$  do
    if  $s_i \geq \hat{s}$  then
      return  $(y_i, s_i)$ 

```

---

Assuming the score of  $\mathcal{A}_i(D)$  always lies in the set  $X$ , it is easy to see that Algorithm 9 simulates the top-1 one-shot selection algorithm (Algorithm 3 with  $k = 1$ ) perfectly. Namely, Algorithm 9 first runs each  $\mathcal{A}_i(D)$  once and collects  $m$  results. Then, the algorithm searches for the *lowest*  $\hat{s} \in X$  such that there is a pair  $(y_i, s_i)$  with a score of at least  $s_i \geq \hat{s}$ . The algorithm then publishes this score.

On the other hand, we note that Algorithm 9 can be implemented by the conditional release with revisions framework (Algorithm 2). Namely, Algorithm 9 first runs each private algorithm once and stores all the outcomes. Then the algorithm gradually extends the target set (namely, when the algorithm is searching for the threshold  $\hat{s}$ , the target set is  $\{(y, s) : s \geq \hat{s}\}$ ), and tries to find an outcome in the target. Therefore, it follows from Lemma 2.5 and Theorem B.4 that Algorithm 9 is  $(O(\varepsilon \log(1/\delta)), \delta + \sum_i \delta_i)$ -DP.

**Continuous scores.** We then consider the case that the distributions of the scores of  $\mathcal{A}_1(D), \dots, \mathcal{A}_K(D)$  are *continuous* over  $\mathbb{R}$ . We additionally assume that the distribution has no “point mass”. This is to say, for every  $i \in [m]$  and  $\hat{s} \in \mathbb{R}$ , it holds that

$$\lim_{\Delta \rightarrow 0} \Pr_{(y_i, s_i) \sim \mathcal{A}_i(D)} [\hat{s} - \Delta \leq s \leq \hat{s} + \Delta] = 0.$$

This assumption is without loss of generality because we can always add a tiny perturbation to the original output score of  $\mathcal{A}_i(D)$ .

Fix  $D, D'$  as two neighboring data sets. We show that the vanilla selection algorithm preserves differential privacy between  $D$  and  $D'$ .

971 Let  $\eta > 0$  be an arbitrarily small real number. Set  $M = \frac{10 \cdot m^4}{\eta}$ . For each  $\ell \in [1, M]$ , let  $q_\ell \in \mathbb{R}$  be  
 972 the unique real such that

$$\Pr_{i \sim [m], (y_i, s_i) \sim \mathcal{A}_i(D)}[s_i \geq q_\ell] = \frac{\ell}{M+1}.$$

973 Similarly we define  $q'_\ell$  with respect to  $\mathcal{A}_i(D')$ . Let  $X = \{q_\ell, q'_\ell\}$ .

974 Now, consider running Algorithm 9 with the set  $X$  and candidate algorithms  $\mathcal{A}_1, \dots, \mathcal{A}_K$  on  $D$  or  
 975  $D'$ . Sort elements of  $X$  in the increasing order, which we denote as  $X = \{\hat{q}_1 \leq \dots \leq \hat{q}_m\}$ . After  
 976 sampling  $\mathcal{A}_i(D)$  for each  $i \in [m]$ , Algorithm 9 fails to return the best outcome only if one of the  
 977 following events happens.

- 978 • The best outcome  $(y^*, s^*)$  satisfies that  $s^* < \hat{q}_1$ .
- 979 • There are two outcomes  $(y_i, s_i)$  and  $(y_j, s_j)$  such that  $s_i, s_j \in [\hat{q}_\ell, \hat{q}_{\ell+1})$  for some  $\ell \in [n]$ .

980 If Item 1 happens, Algorithm 9 does not output anything. If Item 2 happens, then it might be possible  
 981 that  $i < j$ ,  $s_i > s_j$ , but Algorithm 9 outputs  $s_i$ .

982 It is easy to see that Event 1 happens with probability at most  $\frac{m^2}{M} \leq \eta$  by the construction of  
 983  $X$ . Event 2 happens with probability at most  $M \cdot \frac{m^4}{M^2} \leq \eta$ . Therefore, the output distribution of  
 984 Algorithm 9 differs from the true best outcome by at most  $O(\eta)$  in the statistical distance. Taking the  
 985 limit  $\eta \rightarrow 0$  completes the proof.  $\square$

986 **Remark I.2.** Theorem I.1 shows that there is a factor of  $\log(1/\delta)$  overhead when we run top-1  
 987 one-shot private selection (Algorithm 9) only once. Nevertheless, we observe that if we compose top-1  
 988 one-shot selection with other algorithms under the TCT framework (e.g., compose multiple top-1  
 989 one-shot selections, generalized private testing, or any other applications mentioned in this paper),  
 990 then on-average we only pay  $4\varepsilon$  privacy cost (one NotPrior target hit with a  $2\varepsilon$ -DP algorithm) per  
 991 top-1 selection (assuming  $\varepsilon$  is sufficiently small so that  $e^\varepsilon \approx 1$ ). In particular, adaptively performing  
 992  $c$  executions of top-1 selection is  $(\varepsilon', \delta)$ -DP where  $\varepsilon' = \varepsilon \cdot (4\sqrt{c} \log(1/\delta) + o(\sqrt{c}))$ .

993 Liu and Talwar [21] established a lower bound of  $2\varepsilon$  on the privacy of a more relaxed top-1 selection  
 994 task. Hence, there is a factor of 2 gap between this lower bound and our privacy analysis. Note that  
 995 for the simpler task of one-shot above threshold score (discussed in Section 2.4.1), where the goal is  
 996 to return a response that is above the threshold if there is one, can be implemented using a single  
 997 target hit on Conditional Release call (without revise) and this matches the lower bound of  $2\varepsilon$ . We  
 998 therefore suspect that it might be possible to tighten the privacy analysis of top-1 one-shot selection.  
 999 We leave it as an interesting question for followup work.

## 1000 I.1 One-Shot Top- $k$ Selection

1001 In this section, we prove our results for top- $k$  selection.

1002 We consider the natural one-shot algorithm for top- $k$  selection described in Algorithm 3, which (as  
 1003 mentioned in the introduction) generalizes the results presented in [9, 29], which were tailored for  
 1004 selecting from 1-Lipschitz functions, using the Exponential Mechanism or the Report-Noise-Max  
 1005 paradigm.

1006 We prove the following privacy theorem for Algorithm 3.

1007 **Theorem I.3.** Suppose  $\varepsilon < 1$ . Assume that each  $\mathcal{A}_i$  is  $(\varepsilon, 0)$ -DP. Then, for every  $\delta \in (0, 1)$ ,  
 1008 Algorithm 3 is  $(\varepsilon \cdot O(\sqrt{k \log(\frac{1}{\delta})} + \log(\frac{1}{\delta})), \delta)$ -DP.

1009 **Remark I.4.** The constant hidden in the big-Oh depends on  $\varepsilon$ . For the setting that  $\varepsilon$  is close to zero so  
 1010 that  $e^\varepsilon \approx 1$  and  $\delta \geq 2^{o(k)}$ , the privacy bound is roughly  $(\varepsilon', \delta)$ -DP where  $\varepsilon' = \varepsilon \cdot (4\sqrt{k \log(1/\delta)} +$   
 1011  $o(\sqrt{k}))$ .

1012 **Remark I.5.** We can take  $\mathcal{A}_i$  as the Laplace mechanism applied to a 1-Lipschitz quality function  $f_i$   
 1013 (namely,  $\mathcal{A}_i(D)$  outputs a pair  $(i, f_i(D) + \text{Lap}(1/\varepsilon))$ , where  $i$  denotes the ID of the  $i$ -th candidate,  
 1014 and  $f_i(D) + \text{Lap}(1/\varepsilon)$  is the noisy quality score of Candidate  $i$  with respect to the data  $D$ ). In this  
 1015 way, Theorem I.3 recovers the main result of [29].

1016 *Moreover, Theorem I.3 improves over [29] from three aspects: Firstly, Theorem I.3 allows us to*  
1017 *report the noisy quality scores of selected candidates for free, while [29] needs to run one additional*  
1018 *round of Laplace mechanism to publish the quality scores. Second, our privacy bound has no*  
1019 *dependence on  $m$ , while the bound in the prior work [29] was  $(O(\varepsilon \sqrt{k \log(m/\delta)}), \delta)$ -DP. Lastly,*  
1020 *Theorem I.3 applies more generally to any private-preserving algorithms, instead of the classic*  
1021 *Laplace mechanism.*

1022 *Proof.* The proof is similar to that of Theorem I.1. Namely, we run each  $\mathcal{A}_i(D)$  once and store all  
1023 results. Then we maintain a threshold  $T$ , which starts with  $T = \infty$ . We gradually decrease  $T$ , and  
1024 use Algorithm 2 (Conditional Release with Revised Calls) to find outcomes with a quality score  
1025 larger than  $T$ . We keep this process until we identify  $k$  largest outcomes. The claimed privacy bound  
1026 now follows from Lemma 2.5 and Theorem B.4.  $\square$
